# Supplementary material for: Strain-to-strain variation of Rhodococcus equi growth and biofilm formation in vitro
Source: BMC Res Notes. 2019 Aug 19;12:519. doi: 10.1186/s13104-019-4560-1 (PMC6701102; doi:10.1186/s13104-019-4560-1)
Supplement: Supplementary file 1 — Additional file 1. Raw data and calculations for the growth parameters of twelve R. equi isolates. Raw data collected to measure liquid and solid media growth and biofilm formation, as well as calculations done to determine the generation times in liquid media for each isolate. [file 13104_2019_4560_MOESM1_ESM.xlsx]

## Sheet: Liquid growth raw data
ORDER	Replicate	Strain	Growth condition	Time (h)	Blanked OD600nm	AVG CFU/mL	CFU dil'n 1	CFU dil'n 2	AUC increments	Total AUC	log10 AUC	Generation time (h) 4-12
1	1	WSU002	SCI into 1 mL BHI, 100 uL into 5 mL BHI, 37C 100 rpm	0	-0.007	550000	550000		1084400000
1	1	WSU002	SCI into 1 mL BHI, 100 uL into 5 mL BHI, 37C 100 rpm	16	0.251	135000000	170000000	100000000	920000000
1	1	WSU002	SCI into 1 mL BHI, 100 uL into 5 mL BHI, 37C 100 rpm	20	0.315	325000000	2.5e+08	400000000	1160000000
1	1	WSU002	SCI into 1 mL BHI, 100 uL into 5 mL BHI, 37C 100 rpm	24	0.438	255000000	310000000	200000000	9240000000
1	1	WSU002	SCI into 1 mL BHI, 100 uL into 5 mL BHI, 37C 100 rpm	40	1.538	900000000	900000000			12404400000	10.0936
1	2	WSU002	SCI into 1 mL BHI, 100 uL into 5 mL BHI, 37C 100 rpm	0	-0.02	100000	100000		1360800000
1	2	WSU002	SCI into 1 mL BHI, 100 uL into 5 mL BHI, 37C 100 rpm	16	0.272	170000000	140000000	200000000	740000000
1	2	WSU002	SCI into 1 mL BHI, 100 uL into 5 mL BHI, 37C 100 rpm	20	0.482	200000000	2e+08	200000000	800000000
1	2	WSU002	SCI into 1 mL BHI, 100 uL into 5 mL BHI, 37C 100 rpm	24	0.833	200000000	200000000		7200000000
1	2	WSU002	SCI into 1 mL BHI, 100 uL into 5 mL BHI, 37C 100 rpm	40	2.057	700000000	700000000			10100800000	10.0044
1	3	WSU002	SCI into 1 mL BHI, 100 uL into 5 mL BHI, 37C 100 rpm	0	-0.021	495000	290000	700000	1723960000
1	3	WSU002	SCI into 1 mL BHI, 100 uL into 5 mL BHI, 37C 100 rpm	16	0.421	215000000	2.3e+08	200000000	1180000000
1	3	WSU002	SCI into 1 mL BHI, 100 uL into 5 mL BHI, 37C 100 rpm	20	0.583	375000000	3.5e+08	400000000	1280000000
1	3	WSU002	SCI into 1 mL BHI, 100 uL into 5 mL BHI, 37C 100 rpm	24	0.856	265000000	330000000	200000000	3520000000
1	3	WSU002	SCI into 1 mL BHI, 100 uL into 5 mL BHI, 37C 100 rpm	40	1.669	175000000	2.5e+08	100000000		7703960000	9.88671
1	4	WSU002	SCI into 1 mL BHI, 100 uL into 5 mL BHI, 37C 100 rpm	0	0.006	1075000	650000	1.5e+06	1.0486e+09
1	4	WSU002	SCI into 1 mL BHI, 100 uL into 5 mL BHI, 37C 100 rpm	16	0.305	1.3e+08	1.3e+08		570000000
1	4	WSU002	SCI into 1 mL BHI, 100 uL into 5 mL BHI, 37C 100 rpm	20	0.427	155000000	2.1e+08	100000000	920000000
1	4	WSU002	SCI into 1 mL BHI, 100 uL into 5 mL BHI, 37C 100 rpm	24	0.543	305000000	2.1e+08	400000000	5760000000
1	4	WSU002	SCI into 1 mL BHI, 100 uL into 5 mL BHI, 37C 100 rpm	40	1.463	415000000	330000000	500000000		8298600000	9.919
1	5	WSU002	SCI into 1 mL BHI, 100 uL into 5 mL BHI, 37C 100 rpm	0		235000	70000	400000	650000
1	5	WSU002	SCI into 1 mL BHI, 100 uL into 5 mL BHI, 37C 100 rpm	4		90000	90000		2980000
1	5	WSU002	SCI into 1 mL BHI, 100 uL into 5 mL BHI, 37C 100 rpm	8		1400000	1400000		8.18e+07
1	5	WSU002	SCI into 1 mL BHI, 100 uL into 5 mL BHI, 37C 100 rpm	12		3.95e+07	2.9e+07	5e+07		8.543e+07	7.93161	0.917455
1	6	WSU002	SCI into 1 mL BHI, 100 uL into 5 mL BHI, 37C 100 rpm	0		110000	20000	200000	.
1	6	WSU002	SCI into 1 mL BHI, 100 uL into 5 mL BHI, 37C 100 rpm	4		.	20000		.
1	6	WSU002	SCI into 1 mL BHI, 100 uL into 5 mL BHI, 37C 100 rpm	8		950000	900000	1e+06	6.29e+07
1	6	WSU002	SCI into 1 mL BHI, 100 uL into 5 mL BHI, 37C 100 rpm	12		3.05e+07	3.1e+07	3e+07		.	.	.
1	8	WSU002	SCI into 1 mL BHI, 100 uL into 5 mL BHI, 37C 100 rpm	0		210000	120000	300000	680000
1	8	WSU002	SCI into 1 mL BHI, 100 uL into 5 mL BHI, 37C 100 rpm	4		130000	60000	200000	4.86e+06
1	8	WSU002	SCI into 1 mL BHI, 100 uL into 5 mL BHI, 37C 100 rpm	8		2.3e+06	1.6e+06	3e+06	1.056e+08
1	8	WSU002	SCI into 1 mL BHI, 100 uL into 5 mL BHI, 37C 100 rpm	12		5.05e+07	4.1e+07	6e+07		1.1114e+08	8.04587	0.936237
1	9	WSU002	SCI into 1 mL BHI, 100 uL into 5 mL BHI, 37C 100 rpm	0		90000	90000		300000
1	9	WSU002	SCI into 1 mL BHI, 100 uL into 5 mL BHI, 37C 100 rpm	4		60000	60000		5420000
1	9	WSU002	SCI into 1 mL BHI, 100 uL into 5 mL BHI, 37C 100 rpm	8		2650000	1300000	4e+06	84300000
1	9	WSU002	SCI into 1 mL BHI, 100 uL into 5 mL BHI, 37C 100 rpm	12		39500000	3.9e+07	40000000		90020000	7.95434	0.860134
2	1	WSU003	SCI into 1 mL BHI, 100 uL into 5 mL BHI, 37C 100 rpm	0	-0.006	255000	255000		1042040000
2	1	WSU003	SCI into 1 mL BHI, 100 uL into 5 mL BHI, 37C 100 rpm	16	0.322	130000000	160000000	100000000	1240000000
2	1	WSU003	SCI into 1 mL BHI, 100 uL into 5 mL BHI, 37C 100 rpm	20	0.469	490000000	1.8e+08	800000000	1530000000
2	1	WSU003	SCI into 1 mL BHI, 100 uL into 5 mL BHI, 37C 100 rpm	24	0.61	275000000	3.5e+08	200000000	6240000000
2	1	WSU003	SCI into 1 mL BHI, 100 uL into 5 mL BHI, 37C 100 rpm	40	1.173	505000000	4.1e+08	600000000		10052040000	10.0023
2	2	WSU003	SCI into 1 mL BHI, 100 uL into 5 mL BHI, 37C 100 rpm	0	-0.017	800000	800000		1526400000
2	2	WSU003	SCI into 1 mL BHI, 100 uL into 5 mL BHI, 37C 100 rpm	16	0.331	190000000	80000000	300000000	850000000
2	2	WSU003	SCI into 1 mL BHI, 100 uL into 5 mL BHI, 37C 100 rpm	20	0.467	235000000	170000000	300000000	880000000
2	2	WSU003	SCI into 1 mL BHI, 100 uL into 5 mL BHI, 37C 100 rpm	24	0.656	205000000	2.1e+08	200000000	4680000000
2	2	WSU003	SCI into 1 mL BHI, 100 uL into 5 mL BHI, 37C 100 rpm	40	1.884	380000000	4.6e+08	300000000		7936400000	9.89962
2	4	WSU003	SCI into 1 mL BHI, 100 uL into 5 mL BHI, 37C 100 rpm	0	0.003	145000	190000	100000	1721160000
2	4	WSU003	SCI into 1 mL BHI, 100 uL into 5 mL BHI, 37C 100 rpm	16	0.325	215000000	1.3e+08	300000000	1060000000
2	4	WSU003	SCI into 1 mL BHI, 100 uL into 5 mL BHI, 37C 100 rpm	20	0.447	315000000	2.3e+08	400000000	1130000000
2	4	WSU003	SCI into 1 mL BHI, 100 uL into 5 mL BHI, 37C 100 rpm	24	0.614	250000000	300000000	200000000	4480000000
2	4	WSU003	SCI into 1 mL BHI, 100 uL into 5 mL BHI, 37C 100 rpm	40	1.386	310000000	320000000	300000000		8391160000	9.92382
2	5	WSU003	SCI into 1 mL BHI, 100 uL into 5 mL BHI, 37C 100 rpm	0		320000	240000	400000	1260000
2	5	WSU003	SCI into 1 mL BHI, 100 uL into 5 mL BHI, 37C 100 rpm	4		310000	310000		17620000
2	5	WSU003	SCI into 1 mL BHI, 100 uL into 5 mL BHI, 37C 100 rpm	8		8500000	5000000	1.2e+07	2.37e+08
2	5	WSU003	SCI into 1 mL BHI, 100 uL into 5 mL BHI, 37C 100 rpm	12		1.1e+08		1.1e+08		2.5588e+08	8.40804	0.950672
2	6	WSU003	SCI into 1 mL BHI, 100 uL into 5 mL BHI, 37C 100 rpm	0		335000	170000	500000	1030000
2	6	WSU003	SCI into 1 mL BHI, 100 uL into 5 mL BHI, 37C 100 rpm	4		180000	260000	100000	12960000
2	6	WSU003	SCI into 1 mL BHI, 100 uL into 5 mL BHI, 37C 100 rpm	8		6300000	5600000	7e+06	2.326e+08
2	6	WSU003	SCI into 1 mL BHI, 100 uL into 5 mL BHI, 37C 100 rpm	12		1.1e+08		1.1e+08		2.4659e+08	8.39198	0.870114
2	7	WSU003	SCI into 1 mL BHI, 100 uL into 5 mL BHI, 37C 100 rpm	0		190000	180000	200000	700000
2	7	WSU003	SCI into 1 mL BHI, 100 uL into 5 mL BHI, 37C 100 rpm	4		160000	120000	200000	7.12e+06
2	7	WSU003	SCI into 1 mL BHI, 100 uL into 5 mL BHI, 37C 100 rpm	8		3.4e+06	3.8e+06	3e+06	136800000
2	7	WSU003	SCI into 1 mL BHI, 100 uL into 5 mL BHI, 37C 100 rpm	12		65000000	5e+07	80000000		144620000	8.16023	0.929258
2	8	WSU003	SCI into 1 mL BHI, 100 uL into 5 mL BHI, 37C 100 rpm	0		.		1.5e+06	.
2	8	WSU003	SCI into 1 mL BHI, 100 uL into 5 mL BHI, 37C 100 rpm	4		125000	150000	100000	1.025e+07
2	8	WSU003	SCI into 1 mL BHI, 100 uL into 5 mL BHI, 37C 100 rpm	8		5e+06	6e+06	4e+06	1.53e+08
2	8	WSU003	SCI into 1 mL BHI, 100 uL into 5 mL BHI, 37C 100 rpm	12		7.15e+07	4.3e+07	1e+08		.	#VALUE!	0.879178
3	1	WSU005	SCI into 1 mL BHI, 100 uL into 5 mL BHI, 37C 100 rpm	0	0.01	215000	230000	200000	1001720000
3	1	WSU005	SCI into 1 mL BHI, 100 uL into 5 mL BHI, 37C 100 rpm	16	0.211	125000000	150000000	100000000	810000000
3	1	WSU005	SCI into 1 mL BHI, 100 uL into 5 mL BHI, 37C 100 rpm	20	0.363	280000000	2.6e+08	300000000	1190000000
3	1	WSU005	SCI into 1 mL BHI, 100 uL into 5 mL BHI, 37C 100 rpm	24	0.596	315000000	2.3e+08	400000000	6480000000
3	1	WSU005	SCI into 1 mL BHI, 100 uL into 5 mL BHI, 37C 100 rpm	40	2.29	495000000	3.9e+08	600000000		9481720000	9.97689
3	2	WSU005	SCI into 1 mL BHI, 100 uL into 5 mL BHI, 37C 100 rpm	0	0.005	175000	150000	200000	1721400000
3	2	WSU005	SCI into 1 mL BHI, 100 uL into 5 mL BHI, 37C 100 rpm	16	0.256	215000000	1.3e+08	300000000	1160000000
3	2	WSU005	SCI into 1 mL BHI, 100 uL into 5 mL BHI, 37C 100 rpm	20	0.362	365000000	2.3e+08	500000000	1340000000
3	2	WSU005	SCI into 1 mL BHI, 100 uL into 5 mL BHI, 37C 100 rpm	24	0.492	305000000	2.1e+08	400000000	4840000000
3	2	WSU005	SCI into 1 mL BHI, 100 uL into 5 mL BHI, 37C 100 rpm	40	1.755	300000000	300000000			9061400000	9.9572
3	4	WSU005	SCI into 1 mL BHI, 100 uL into 5 mL BHI, 37C 100 rpm	0	0.004	75000	50000	100000	1360600000
3	4	WSU005	SCI into 1 mL BHI, 100 uL into 5 mL BHI, 37C 100 rpm	16	0.213	170000000	140000000	200000000	740000000
3	4	WSU005	SCI into 1 mL BHI, 100 uL into 5 mL BHI, 37C 100 rpm	20	0.344	200000000	2e+08	200000000	1040000000
3	4	WSU005	SCI into 1 mL BHI, 100 uL into 5 mL BHI, 37C 100 rpm	24	0.498	320000000	340000000	300000000	4760000000
3	4	WSU005	SCI into 1 mL BHI, 100 uL into 5 mL BHI, 37C 100 rpm	40	2.165	275000000	4.5e+08	100000000		7900600000	9.89766
3	5	WSU005	SCI into 1 mL BHI, 100 uL into 5 mL BHI, 37C 100 rpm	0		160000	220000	100000	560000
3	5	WSU005	SCI into 1 mL BHI, 100 uL into 5 mL BHI, 37C 100 rpm	4		120000	140000	100000	5640000
3	5	WSU005	SCI into 1 mL BHI, 100 uL into 5 mL BHI, 37C 100 rpm	8		2700000	2400000	3e+06	2.454e+08
3	5	WSU005	SCI into 1 mL BHI, 100 uL into 5 mL BHI, 37C 100 rpm	12		1.2e+08		1.2e+08		2.516e+08	8.40071	0.808081
3	6	WSU005	SCI into 1 mL BHI, 100 uL into 5 mL BHI, 37C 100 rpm	0		175000	250000	100000	630000
3	6	WSU005	SCI into 1 mL BHI, 100 uL into 5 mL BHI, 37C 100 rpm	4		140000	180000	100000	7.58e+06
3	6	WSU005	SCI into 1 mL BHI, 100 uL into 5 mL BHI, 37C 100 rpm	8		3.65e+06	2300000	5e+06	147300000
3	6	WSU005	SCI into 1 mL BHI, 100 uL into 5 mL BHI, 37C 100 rpm	12		70000000		70000000		155510000	8.19176	0.89821
3	7	WSU005	SCI into 1 mL BHI, 100 uL into 5 mL BHI, 37C 100 rpm	0		190000	190000		800000
3	7	WSU005	SCI into 1 mL BHI, 100 uL into 5 mL BHI, 37C 100 rpm	4		210000	120000	300000	6620000
3	7	WSU005	SCI into 1 mL BHI, 100 uL into 5 mL BHI, 37C 100 rpm	8		3100000	2200000	4e+06	7.22e+07
3	7	WSU005	SCI into 1 mL BHI, 100 uL into 5 mL BHI, 37C 100 rpm	12		3.3e+07	3.6e+07	3e+07		7.962e+07	7.90102	1.10379
3	8	WSU005	SCI into 1 mL BHI, 100 uL into 5 mL BHI, 37C 100 rpm	0		420000	140000	700000	1040000
3	8	WSU005	SCI into 1 mL BHI, 100 uL into 5 mL BHI, 37C 100 rpm	4		100000	100000		4900000
3	8	WSU005	SCI into 1 mL BHI, 100 uL into 5 mL BHI, 37C 100 rpm	8		2350000	2700000	2e+06	1.047e+08
3	8	WSU005	SCI into 1 mL BHI, 100 uL into 5 mL BHI, 37C 100 rpm	12		5e+07	.	5e+07		1.1064e+08	8.04391	0.89821
4	1	WSU001	SCI into 1 mL BHI, 100 uL into 5 mL BHI, 37C 100 rpm	0	-0.023	1.8e+06	1.8e+06		1454400000
4	1	WSU001	SCI into 1 mL BHI, 100 uL into 5 mL BHI, 37C 100 rpm	16	0.376	180000000	160000000	200000000	980000000
4	1	WSU001	SCI into 1 mL BHI, 100 uL into 5 mL BHI, 37C 100 rpm	20	0.49	310000000	320000000	300000000	1490000000
4	1	WSU001	SCI into 1 mL BHI, 100 uL into 5 mL BHI, 37C 100 rpm	24	0.649	435000000	270000000	600000000	7400000000
4	1	WSU001	SCI into 1 mL BHI, 100 uL into 5 mL BHI, 37C 100 rpm	40	1.782	490000000	280000000	700000000		11324400000	10.054
4	2	WSU001	SCI into 1 mL BHI, 100 uL into 5 mL BHI, 37C 100 rpm	0	0.008	190000	180000	200000	2481520000
4	2	WSU001	SCI into 1 mL BHI, 100 uL into 5 mL BHI, 37C 100 rpm	16	0.456	310000000	2.2e+08	400000000	1210000000
4	2	WSU001	SCI into 1 mL BHI, 100 uL into 5 mL BHI, 37C 100 rpm	20	0.634	295000000	3.9e+08	200000000	1210000000
4	2	WSU001	SCI into 1 mL BHI, 100 uL into 5 mL BHI, 37C 100 rpm	24	0.837	310000000	4.2e+08	200000000	4840000000
4	2	WSU001	SCI into 1 mL BHI, 100 uL into 5 mL BHI, 37C 100 rpm	40	2.16	295000000	290000000	300000000		9741520000	9.98863
4	3	WSU001	SCI into 1 mL BHI, 100 uL into 5 mL BHI, 37C 100 rpm	0	0.003	255000	210000	300000	1282040000
4	3	WSU001	SCI into 1 mL BHI, 100 uL into 5 mL BHI, 37C 100 rpm	16	0.333	160000000	1.2e+08	200000000	780000000
4	3	WSU001	SCI into 1 mL BHI, 100 uL into 5 mL BHI, 37C 100 rpm	20	0.526	2.3e+08	3.6e+08	100000000	1160000000
4	3	WSU001	SCI into 1 mL BHI, 100 uL into 5 mL BHI, 37C 100 rpm	24	0.681	350000000	4e+08	300000000	7520000000
4	3	WSU001	SCI into 1 mL BHI, 100 uL into 5 mL BHI, 37C 100 rpm	40	2.018	590000000	580000000	600000000		10742040000	10.0311
4	4	WSU001	SCI into 1 mL BHI, 100 uL into 5 mL BHI, 37C 100 rpm	0	0.003	165000	130000	200000	761320000
4	4	WSU001	SCI into 1 mL BHI, 100 uL into 5 mL BHI, 37C 100 rpm	16	0.173	95000000	9e+07	100000000	590000000
4	4	WSU001	SCI into 1 mL BHI, 100 uL into 5 mL BHI, 37C 100 rpm	20	0.296	200000000	300000000	100000000	810000000
4	4	WSU001	SCI into 1 mL BHI, 100 uL into 5 mL BHI, 37C 100 rpm	24	0.41	205000000	2.1e+08	200000000	4280000000
4	4	WSU001	SCI into 1 mL BHI, 100 uL into 5 mL BHI, 37C 100 rpm	40	0.902	330000000	3.6e+08	300000000		6441320000	9.80897
4	5	WSU001	SCI into 1 mL BHI, 100 uL into 5 mL BHI, 37C 100 rpm	0		260000	320000	200000	1180000
4	5	WSU001	SCI into 1 mL BHI, 100 uL into 5 mL BHI, 37C 100 rpm	4		330000	460000	200000	1.666e+07
4	5	WSU001	SCI into 1 mL BHI, 100 uL into 5 mL BHI, 37C 100 rpm	8		8e+06		8e+06	88000000
4	5	WSU001	SCI into 1 mL BHI, 100 uL into 5 mL BHI, 37C 100 rpm	12		36000000	3.2e+07	40000000		105840000	8.02465	1.18964
4	6	WSU001	SCI into 1 mL BHI, 100 uL into 5 mL BHI, 37C 100 rpm	0		250000	300000	200000	870000
4	6	WSU001	SCI into 1 mL BHI, 100 uL into 5 mL BHI, 37C 100 rpm	4		185000	270000	100000	1.087e+07
4	6	WSU001	SCI into 1 mL BHI, 100 uL into 5 mL BHI, 37C 100 rpm	8		5.25e+06	3.5e+06	7e+06	1.445e+08
4	6	WSU001	SCI into 1 mL BHI, 100 uL into 5 mL BHI, 37C 100 rpm	12		6.7e+07	7.4e+07	6e+07		1.5624e+08	8.19379	0.947376
4	7	WSU001	SCI into 1 mL BHI, 100 uL into 5 mL BHI, 37C 100 rpm	0		290000	280000	300000	1120000
4	7	WSU001	SCI into 1 mL BHI, 100 uL into 5 mL BHI, 37C 100 rpm	4		270000	240000	300000	8640000
4	7	WSU001	SCI into 1 mL BHI, 100 uL into 5 mL BHI, 37C 100 rpm	8		4.05e+06	4.1e+06	4e+06	1.501e+08
4	7	WSU001	SCI into 1 mL BHI, 100 uL into 5 mL BHI, 37C 100 rpm	12		7.1e+07	5.2e+07	9e+07		1.5986e+08	8.20374	1.0018
4	8	WSU001	SCI into 1 mL BHI, 100 uL into 5 mL BHI, 37C 100 rpm	0		235000	270000	200000	780000
4	8	WSU001	SCI into 1 mL BHI, 100 uL into 5 mL BHI, 37C 100 rpm	4		155000	110000	200000	4310000
4	8	WSU001	SCI into 1 mL BHI, 100 uL into 5 mL BHI, 37C 100 rpm	8		2e+06	.	2e+06	1.51e+08
4	8	WSU001	SCI into 1 mL BHI, 100 uL into 5 mL BHI, 37C 100 rpm	12		7.35e+07	3.7e+07	1.1e+08		1.5609e+08	8.19338	0.905935
5	1	WSU004	SCI into 1 mL BHI, 100 uL into 5 mL BHI, 37C 100 rpm	0	-0.02	200000	200000		2121600000
5	1	WSU004	SCI into 1 mL BHI, 100 uL into 5 mL BHI, 37C 100 rpm	16	0.317	265000000	2.3e+08	300000000	1010000000
5	1	WSU004	SCI into 1 mL BHI, 100 uL into 5 mL BHI, 37C 100 rpm	20	0.444	240000000	280000000	200000000	950000000
5	1	WSU004	SCI into 1 mL BHI, 100 uL into 5 mL BHI, 37C 100 rpm	24	0.56	235000000	270000000	200000000	5000000000
5	1	WSU004	SCI into 1 mL BHI, 100 uL into 5 mL BHI, 37C 100 rpm	40	1.378	390000000	3.8e+08	400000000		9081600000	9.95816
5	2	WSU004	SCI into 1 mL BHI, 100 uL into 5 mL BHI, 37C 100 rpm	0	0.009	265000	230000	300000	3082120000
5	2	WSU004	SCI into 1 mL BHI, 100 uL into 5 mL BHI, 37C 100 rpm	16	0.401	385000000	270000000	500000000	1670000000
5	2	WSU004	SCI into 1 mL BHI, 100 uL into 5 mL BHI, 37C 100 rpm	20	0.474	450000000	300000000	600000000	1580000000
5	2	WSU004	SCI into 1 mL BHI, 100 uL into 5 mL BHI, 37C 100 rpm	24	0.63	340000000	280000000	400000000	5520000000
5	2	WSU004	SCI into 1 mL BHI, 100 uL into 5 mL BHI, 37C 100 rpm	40	1.146	3.5e+08	3.5e+08			11852120000	10.0738
5	4	WSU004	SCI into 1 mL BHI, 100 uL into 5 mL BHI, 37C 100 rpm	0	0.006	435000	470000	400000	3043480000
5	4	WSU004	SCI into 1 mL BHI, 100 uL into 5 mL BHI, 37C 100 rpm	16	0.333	380000000	160000000	600000000	1420000000
5	4	WSU004	SCI into 1 mL BHI, 100 uL into 5 mL BHI, 37C 100 rpm	20	0.409	330000000	160000000	500000000	1190000000
5	4	WSU004	SCI into 1 mL BHI, 100 uL into 5 mL BHI, 37C 100 rpm	24	0.525	2.65e+08	4.3e+08	100000000	5040000000
5	4	WSU004	SCI into 1 mL BHI, 100 uL into 5 mL BHI, 37C 100 rpm	40	1.008	365000000	330000000	400000000		10693480000	10.0291
5	6	WSU004	SCI into 1 mL BHI, 100 uL into 5 mL BHI, 37C 100 rpm	0		515000	330000	700000	1440000
5	6	WSU004	SCI into 1 mL BHI, 100 uL into 5 mL BHI, 37C 100 rpm	4		205000	310000	100000	1.231e+07
5	6	WSU004	SCI into 1 mL BHI, 100 uL into 5 mL BHI, 37C 100 rpm	8		5.95e+06	3.9e+06	8e+06	83900000
5	6	WSU004	SCI into 1 mL BHI, 100 uL into 5 mL BHI, 37C 100 rpm	12		36000000	3.2e+07	40000000		97650000	7.98967	1.08006
5	7	WSU004	SCI into 1 mL BHI, 100 uL into 5 mL BHI, 37C 100 rpm	0		1200000		1200000	4000000
5	7	WSU004	SCI into 1 mL BHI, 100 uL into 5 mL BHI, 37C 100 rpm	4		800000		800000	1.36e+07
5	7	WSU004	SCI into 1 mL BHI, 100 uL into 5 mL BHI, 37C 100 rpm	8		6e+06		6e+06	312000000
5	7	WSU004	SCI into 1 mL BHI, 100 uL into 5 mL BHI, 37C 100 rpm	12		150000000		150000000		329600000	8.51799	1.06654
5	8	WSU004	SCI into 1 mL BHI, 100 uL into 5 mL BHI, 37C 100 rpm	0		310000	320000	300000	1200000
5	8	WSU004	SCI into 1 mL BHI, 100 uL into 5 mL BHI, 37C 100 rpm	4		290000	180000	400000	6.48e+06
5	8	WSU004	SCI into 1 mL BHI, 100 uL into 5 mL BHI, 37C 100 rpm	8		2.95e+06	3.9e+06	2e+06	1.949e+08
5	8	WSU004	SCI into 1 mL BHI, 100 uL into 5 mL BHI, 37C 100 rpm	12		9.45e+07	5.9e+07	1.3e+08		2.0258e+08	8.3066	0.964668
6	1	WSU007	SCI into 1 mL BHI, 100 uL into 5 mL BHI, 37C 100 rpm	0	-0.026	200000	100000	300000	1201600000
6	1	WSU007	SCI into 1 mL BHI, 100 uL into 5 mL BHI, 37C 100 rpm	16	0.245	150000000	150000000		550000000
6	1	WSU007	SCI into 1 mL BHI, 100 uL into 5 mL BHI, 37C 100 rpm	20	0.37	125000000	150000000	100000000	580000000
6	1	WSU007	SCI into 1 mL BHI, 100 uL into 5 mL BHI, 37C 100 rpm	24	0.598	165000000	2.3e+08	100000000	1960000000
6	1	WSU007	SCI into 1 mL BHI, 100 uL into 5 mL BHI, 37C 100 rpm	40	1.602	80000000	6e+07	100000000		4291600000	9.63262
6	2	WSU007	SCI into 1 mL BHI, 100 uL into 5 mL BHI, 37C 100 rpm	0	0.003	650000	700000	600000	885200000
6	2	WSU007	SCI into 1 mL BHI, 100 uL into 5 mL BHI, 37C 100 rpm	16	0.41	110000000	1.2e+08	100000000	760000000
6	2	WSU007	SCI into 1 mL BHI, 100 uL into 5 mL BHI, 37C 100 rpm	20	0.578	270000000	140000000	400000000	890000000
6	2	WSU007	SCI into 1 mL BHI, 100 uL into 5 mL BHI, 37C 100 rpm	24	0.852	175000000	150000000	200000000	1480000000
6	2	WSU007	SCI into 1 mL BHI, 100 uL into 5 mL BHI, 37C 100 rpm	40	2.163	10000000	10000000			4015200000	9.60371
6	3	WSU007	SCI into 1 mL BHI, 100 uL into 5 mL BHI, 37C 100 rpm	0	0.005	110000	110000		320880000
6	3	WSU007	SCI into 1 mL BHI, 100 uL into 5 mL BHI, 37C 100 rpm	16	0.101	40000000	40000000		250000000
6	3	WSU007	SCI into 1 mL BHI, 100 uL into 5 mL BHI, 37C 100 rpm	20	0.155	85000000	70000000	100000000	310000000
6	3	WSU007	SCI into 1 mL BHI, 100 uL into 5 mL BHI, 37C 100 rpm	24	0.206	70000000	70000000		1800000000
6	3	WSU007	SCI into 1 mL BHI, 100 uL into 5 mL BHI, 37C 100 rpm	40	0.412	155000000	2.1e+08	100000000		2680880000	9.42828
6	4	WSU007	SCI into 1 mL BHI, 100 uL into 5 mL BHI, 37C 100 rpm	0	0.004	110000	20000	200000	1.04088e+09
6	4	WSU007	SCI into 1 mL BHI, 100 uL into 5 mL BHI, 37C 100 rpm	16	0.229	1.3e+08	1.3e+08		860000000
6	4	WSU007	SCI into 1 mL BHI, 100 uL into 5 mL BHI, 37C 100 rpm	20	0.384	300000000	2e+08	400000000	1020000000
6	4	WSU007	SCI into 1 mL BHI, 100 uL into 5 mL BHI, 37C 100 rpm	24	0.574	210000000	320000000	100000000	3960000000
6	4	WSU007	SCI into 1 mL BHI, 100 uL into 5 mL BHI, 37C 100 rpm	40	1.933	285000000	270000000	300000000		6880880000	9.83764
6	6	WSU007	SCI into 1 mL BHI, 100 uL into 5 mL BHI, 37C 100 rpm	0		175000	50000	300000	500000
6	6	WSU007	SCI into 1 mL BHI, 100 uL into 5 mL BHI, 37C 100 rpm	4		75000	50000	100000	2.75e+06
6	6	WSU007	SCI into 1 mL BHI, 100 uL into 5 mL BHI, 37C 100 rpm	8		1.3e+06	1.6e+06	1e+06	19600000
6	6	WSU007	SCI into 1 mL BHI, 100 uL into 5 mL BHI, 37C 100 rpm	12		8500000	7e+06	10000000		22850000	7.35889	1.18005
6	7	WSU007	SCI into 1 mL BHI, 100 uL into 5 mL BHI, 37C 100 rpm	0		115000	30000	200000	370000
6	7	WSU007	SCI into 1 mL BHI, 100 uL into 5 mL BHI, 37C 100 rpm	4		70000	70000		610000
6	7	WSU007	SCI into 1 mL BHI, 100 uL into 5 mL BHI, 37C 100 rpm	8		235000	170000	300000	29470000
6	7	WSU007	SCI into 1 mL BHI, 100 uL into 5 mL BHI, 37C 100 rpm	12		14500000	9e+06	20000000		30450000	7.48359	1.04661
6	8	WSU007	SCI into 1 mL BHI, 100 uL into 5 mL BHI, 37C 100 rpm	0		130000	130000		450000
6	8	WSU007	SCI into 1 mL BHI, 100 uL into 5 mL BHI, 37C 100 rpm	4		95000	90000	100000	410000
6	8	WSU007	SCI into 1 mL BHI, 100 uL into 5 mL BHI, 37C 100 rpm	8		110000	120000	100000	5.422e+07
6	8	WSU007	SCI into 1 mL BHI, 100 uL into 5 mL BHI, 37C 100 rpm	12		2.7e+07	2.4e+07	3e+07		5.508e+07	7.74099	0.988019
6	9	WSU007	SCI into 1 mL BHI, 100 uL into 5 mL BHI, 37C 100 rpm	0		80000	80000		370000
6	9	WSU007	SCI into 1 mL BHI, 100 uL into 5 mL BHI, 37C 100 rpm	4		105000	110000	100000	3410000
6	9	WSU007	SCI into 1 mL BHI, 100 uL into 5 mL BHI, 37C 100 rpm	8		1600000	1200000	2e+06	7.42e+07
6	9	WSU007	SCI into 1 mL BHI, 100 uL into 5 mL BHI, 37C 100 rpm	12		3.55e+07	2.1e+07	5e+07		7.798e+07	7.89198	0.958563
6	11	WSU007	SCI into 1 mL BHI, 100 uL into 5 mL BHI, 37C 100 rpm	0		535000			1880000
6	11	WSU007	SCI into 1 mL BHI, 100 uL into 5 mL BHI, 37C 100 rpm	4		405000			9910000
6	11	WSU007	SCI into 1 mL BHI, 100 uL into 5 mL BHI, 37C 100 rpm	8		4550000			1.581e+08
6	11	WSU007	SCI into 1 mL BHI, 100 uL into 5 mL BHI, 37C 100 rpm	12		7.45e+07				1.6989e+08	8.23017	1.07045
6	12	WSU007	SCI into 1 mL BHI, 100 uL into 5 mL BHI, 37C 100 rpm	0		530000			.
6	12	WSU007	SCI into 1 mL BHI, 100 uL into 5 mL BHI, 37C 100 rpm	4		.			.
6	12	WSU007	SCI into 1 mL BHI, 100 uL into 5 mL BHI, 37C 100 rpm	8		6.35e+06			1.427e+08
6	12	WSU007	SCI into 1 mL BHI, 100 uL into 5 mL BHI, 37C 100 rpm	12		6.5e+07				.	.	.
7	1	103+	SCI into 1 mL BHI, 100 uL into 5 mL BHI, 37C 100 rpm	0	-0.017	700000	700000		925600000
7	1	103+	SCI into 1 mL BHI, 100 uL into 5 mL BHI, 37C 100 rpm	16	0.285	115000000	1.3e+08	100000000	640000000
7	1	103+	SCI into 1 mL BHI, 100 uL into 5 mL BHI, 37C 100 rpm	20	0.424	205000000	2.1e+08	200000000	990000000
7	1	103+	SCI into 1 mL BHI, 100 uL into 5 mL BHI, 37C 100 rpm	24	0.586	290000000	3.8e+08	200000000	6320000000
7	1	103+	SCI into 1 mL BHI, 100 uL into 5 mL BHI, 37C 100 rpm	40	0.937	500000000	500000000			8875600000	9.9482
7	2	103+	SCI into 1 mL BHI, 100 uL into 5 mL BHI, 37C 100 rpm	0	0.008	180000	160000	200000	601440000
7	2	103+	SCI into 1 mL BHI, 100 uL into 5 mL BHI, 37C 100 rpm	16	0.262	75000000	5e+07	100000000	640000000
7	2	103+	SCI into 1 mL BHI, 100 uL into 5 mL BHI, 37C 100 rpm	20	0.4	245000000	1.9e+08	300000000	750000000
7	2	103+	SCI into 1 mL BHI, 100 uL into 5 mL BHI, 37C 100 rpm	24	0.499	130000000	160000000	100000000	2640000000
7	2	103+	SCI into 1 mL BHI, 100 uL into 5 mL BHI, 37C 100 rpm	40	0.815	200000000	2e+08	200000000		4631440000	9.66572
7	3	103+	SCI into 1 mL BHI, 100 uL into 5 mL BHI, 37C 100 rpm	0	0.001	500000	300000	700000	84000000
7	3	103+	SCI into 1 mL BHI, 100 uL into 5 mL BHI, 37C 100 rpm	16	0.17	10000000	10000000		390000000
7	3	103+	SCI into 1 mL BHI, 100 uL into 5 mL BHI, 37C 100 rpm	20	0.26	185000000	170000000	200000000	660000000
7	3	103+	SCI into 1 mL BHI, 100 uL into 5 mL BHI, 37C 100 rpm	24	0.371	145000000	9e+07	200000000	2360000000
7	3	103+	SCI into 1 mL BHI, 100 uL into 5 mL BHI, 37C 100 rpm	40	0.544	150000000	1e+08	200000000		3494000000	9.54332
7	5	103+	SCI into 1 mL BHI, 100 uL into 5 mL BHI, 37C 100 rpm	0		790000			3510000
7	5	103+	SCI into 1 mL BHI, 100 uL into 5 mL BHI, 37C 100 rpm	4		965000			4.593e+07
7	5	103+	SCI into 1 mL BHI, 100 uL into 5 mL BHI, 37C 100 rpm	8		2.2e+07			1.55e+08
7	5	103+	SCI into 1 mL BHI, 100 uL into 5 mL BHI, 37C 100 rpm	12		5.55e+07				2.0444e+08	8.31057	1.37759
7	8	103+	SCI into 1 mL BHI, 100 uL into 5 mL BHI, 37C 100 rpm	0		870000			3160000
7	8	103+	SCI into 1 mL BHI, 100 uL into 5 mL BHI, 37C 100 rpm	4		710000			.
7	8	103+	SCI into 1 mL BHI, 100 uL into 5 mL BHI, 37C 100 rpm	8		.			.
7	8	103+	SCI into 1 mL BHI, 100 uL into 5 mL BHI, 37C 100 rpm	12		.				.	.	.
7	9	103+	SCI into 1 mL BHI, 100 uL into 5 mL BHI, 37C 100 rpm	0		110000			570000
7	9	103+	SCI into 1 mL BHI, 100 uL into 5 mL BHI, 37C 100 rpm	4		175000			11050000
7	9	103+	SCI into 1 mL BHI, 100 uL into 5 mL BHI, 37C 100 rpm	8		5350000			120700000
7	9	103+	SCI into 1 mL BHI, 100 uL into 5 mL BHI, 37C 100 rpm	12		55000000				132320000	8.12163	0.970736
7	10	103+	SCI into 1 mL BHI, 100 uL into 5 mL BHI, 37C 100 rpm	0		415000			1480000
7	10	103+	SCI into 1 mL BHI, 100 uL into 5 mL BHI, 37C 100 rpm	4		325000			1.405e+07
7	10	103+	SCI into 1 mL BHI, 100 uL into 5 mL BHI, 37C 100 rpm	8		6.7e+06			63400000
7	10	103+	SCI into 1 mL BHI, 100 uL into 5 mL BHI, 37C 100 rpm	12		25000000				78930000	7.89724	1.28535
7	11	103+	SCI into 1 mL BHI, 100 uL into 5 mL BHI, 37C 100 rpm	0		150000			610000
7	11	103+	SCI into 1 mL BHI, 100 uL into 5 mL BHI, 37C 100 rpm	4		155000			5710000
7	11	103+	SCI into 1 mL BHI, 100 uL into 5 mL BHI, 37C 100 rpm	8		2700000			77400000
7	11	103+	SCI into 1 mL BHI, 100 uL into 5 mL BHI, 37C 100 rpm	12		36000000				83720000	7.92283	1.02463
7	12	103+	SCI into 1 mL BHI, 100 uL into 5 mL BHI, 37C 100 rpm	0		175000			650000
7	12	103+	SCI into 1 mL BHI, 100 uL into 5 mL BHI, 37C 100 rpm	4		150000			6600000
7	12	103+	SCI into 1 mL BHI, 100 uL into 5 mL BHI, 37C 100 rpm	8		3150000			1.293e+08
7	12	103+	SCI into 1 mL BHI, 100 uL into 5 mL BHI, 37C 100 rpm	12		6.15e+07				136550000	8.13529	0.927839
8	1	UKVDL206	SCI into 1 mL BHI, 100 uL into 5 mL BHI, 37C 100 rpm	0	-0.019	250000	300000	200000	1082000000
8	1	UKVDL206	SCI into 1 mL BHI, 100 uL into 5 mL BHI, 37C 100 rpm	16	0.262	135000000	170000000	100000000	640000000
8	1	UKVDL206	SCI into 1 mL BHI, 100 uL into 5 mL BHI, 37C 100 rpm	20	0.365	185000000	270000000	100000000	830000000
8	1	UKVDL206	SCI into 1 mL BHI, 100 uL into 5 mL BHI, 37C 100 rpm	24	0.568	230000000	2.6e+08	200000000	4520000000
8	1	UKVDL206	SCI into 1 mL BHI, 100 uL into 5 mL BHI, 37C 100 rpm	40	0.771	335000000	270000000	400000000		7072000000	9.84954
8	2	UKVDL206	SCI into 1 mL BHI, 100 uL into 5 mL BHI, 37C 100 rpm	0	-0.008	195000	90000	300000	761560000
8	2	UKVDL206	SCI into 1 mL BHI, 100 uL into 5 mL BHI, 37C 100 rpm	16	0.183	95000000	9e+07	100000000	770000000
8	2	UKVDL206	SCI into 1 mL BHI, 100 uL into 5 mL BHI, 37C 100 rpm	20	0.308	290000000	280000000	300000000	970000000
8	2	UKVDL206	SCI into 1 mL BHI, 100 uL into 5 mL BHI, 37C 100 rpm	24	0.44	195000000	290000000	100000000	2400000000
8	2	UKVDL206	SCI into 1 mL BHI, 100 uL into 5 mL BHI, 37C 100 rpm	40	0.709	105000000	1.1e+08	100000000		4901560000	9.69033
8	3	UKVDL206	SCI into 1 mL BHI, 100 uL into 5 mL BHI, 37C 100 rpm	0	0.005	430000	260000	600000	163440000
8	3	UKVDL206	SCI into 1 mL BHI, 100 uL into 5 mL BHI, 37C 100 rpm	16	0.165	20000000	20000000		2.2e+08
8	3	UKVDL206	SCI into 1 mL BHI, 100 uL into 5 mL BHI, 37C 100 rpm	20	0.254	9e+07	9e+07		400000000
8	3	UKVDL206	SCI into 1 mL BHI, 100 uL into 5 mL BHI, 37C 100 rpm	24	0.337	110000000	1.2e+08	100000000	1360000000
8	3	UKVDL206	SCI into 1 mL BHI, 100 uL into 5 mL BHI, 37C 100 rpm	40	0.605	60000000	20000000	100000000		2143440000	9.33111
8	5	UKVDL206	SCI into 1 mL BHI, 100 uL into 5 mL BHI, 37C 100 rpm	0		930000	560000	1300000	2570000
8	5	UKVDL206	SCI into 1 mL BHI, 100 uL into 5 mL BHI, 37C 100 rpm	4		355000	510000	200000	2.471e+07
8	5	UKVDL206	SCI into 1 mL BHI, 100 uL into 5 mL BHI, 37C 100 rpm	8		1.2e+07		1.2e+07	1.66e+08
8	5	UKVDL206	SCI into 1 mL BHI, 100 uL into 5 mL BHI, 37C 100 rpm	12		7.1e+07	4.2e+07	1e+08		1.9328e+08	8.28619	1.05355
8	6	UKVDL206	SCI into 1 mL BHI, 100 uL into 5 mL BHI, 37C 100 rpm	0		740000	480000	1e+06	2100000
8	6	UKVDL206	SCI into 1 mL BHI, 100 uL into 5 mL BHI, 37C 100 rpm	4		310000	420000	200000	1.522e+07
8	6	UKVDL206	SCI into 1 mL BHI, 100 uL into 5 mL BHI, 37C 100 rpm	8		7.3e+06	7.6e+06	7e+06	74600000
8	6	UKVDL206	SCI into 1 mL BHI, 100 uL into 5 mL BHI, 37C 100 rpm	12		30000000	2e+07	40000000		91920000	7.96341	1.22081
8	8	UKVDL206	SCI into 1 mL BHI, 100 uL into 5 mL BHI, 37C 100 rpm	0		740000	580000	900000	3470000
8	8	UKVDL206	SCI into 1 mL BHI, 100 uL into 5 mL BHI, 37C 100 rpm	4		995000	590000	1400000	33990000
8	8	UKVDL206	SCI into 1 mL BHI, 100 uL into 5 mL BHI, 37C 100 rpm	8		1.6e+07		1.6e+07	1.52e+08
8	8	UKVDL206	SCI into 1 mL BHI, 100 uL into 5 mL BHI, 37C 100 rpm	12		6e+07		6e+07		1.8946e+08	8.27752	1.36168
8	9	UKVDL206	SCI into 1 mL BHI, 100 uL into 5 mL BHI, 37C 100 rpm	0		400000		400000	1770000
8	9	UKVDL206	SCI into 1 mL BHI, 100 uL into 5 mL BHI, 37C 100 rpm	4		485000	470000	500000	1.747e+07
8	9	UKVDL206	SCI into 1 mL BHI, 100 uL into 5 mL BHI, 37C 100 rpm	8		8.25e+06	6.5e+06	1e+07	336500000
8	9	UKVDL206	SCI into 1 mL BHI, 100 uL into 5 mL BHI, 37C 100 rpm	12		160000000		160000000		355740000	8.55113	0.96262
8	10	UKVDL206	SCI into 1 mL BHI, 100 uL into 5 mL BHI, 37C 100 rpm	0		700000		700000	2180000
8	10	UKVDL206	SCI into 1 mL BHI, 100 uL into 5 mL BHI, 37C 100 rpm	4		390000	480000	300000	1.878e+07
8	10	UKVDL206	SCI into 1 mL BHI, 100 uL into 5 mL BHI, 37C 100 rpm	8		9e+06		9e+06	178000000
8	10	UKVDL206	SCI into 1 mL BHI, 100 uL into 5 mL BHI, 37C 100 rpm	12		80000000		80000000		198960000	8.29877	1.04854
9	1	33701	SCI into 1 mL BHI, 100 uL into 5 mL BHI, 37C 100 rpm	0	-0.008	275000	250000	300000	17800000
9	1	33701	SCI into 1 mL BHI, 100 uL into 5 mL BHI, 37C 100 rpm	16	0.117	1.95e+06	1.9e+06	2e+06	233900000
9	1	33701	SCI into 1 mL BHI, 100 uL into 5 mL BHI, 37C 100 rpm	20	0.253	115000000	3e+07	200000000	510000000
9	1	33701	SCI into 1 mL BHI, 100 uL into 5 mL BHI, 37C 100 rpm	24	0.394	140000000	1.8e+08	100000000	6720000000
9	1	33701	SCI into 1 mL BHI, 100 uL into 5 mL BHI, 37C 100 rpm	40	1.143	700000000	700000000			7481700000	9.874
9	3	33701	SCI into 1 mL BHI, 100 uL into 5 mL BHI, 37C 100 rpm	0	-0.024	170000	140000	200000	1.76136e+09
9	3	33701	SCI into 1 mL BHI, 100 uL into 5 mL BHI, 37C 100 rpm	16	0.246	2.2e+08	2.2e+08		9.2e+08
9	3	33701	SCI into 1 mL BHI, 100 uL into 5 mL BHI, 37C 100 rpm	20	0.391	2.4e+08	2.4e+08		1290000000
9	3	33701	SCI into 1 mL BHI, 100 uL into 5 mL BHI, 37C 100 rpm	24	0.574	405000000	310000000	500000000	.
9	3	33701	SCI into 1 mL BHI, 100 uL into 5 mL BHI, 37C 100 rpm	40	.	.	.	.		9851360000	9.9935
9	4	33701	SCI into 1 mL BHI, 100 uL into 5 mL BHI, 37C 100 rpm	0	0.005	790000	480000	1100000	326320000
9	4	33701	SCI into 1 mL BHI, 100 uL into 5 mL BHI, 37C 100 rpm	16	0.123	40000000	40000000		300000000
9	4	33701	SCI into 1 mL BHI, 100 uL into 5 mL BHI, 37C 100 rpm	20	0.206	110000000	1.2e+08	100000000	800000000
9	4	33701	SCI into 1 mL BHI, 100 uL into 5 mL BHI, 37C 100 rpm	24	0.323	290000000	1.8e+08	400000000	8320000000
9	4	33701	SCI into 1 mL BHI, 100 uL into 5 mL BHI, 37C 100 rpm	40	1.075	750000000	9e+08	600000000		9746320000	9.98884
9	5	33701	SCI into 1 mL BHI, 100 uL into 5 mL BHI, 37C 100 rpm	0	0.002	165000	130000	200000	1.44132e+09
9	5	33701	SCI into 1 mL BHI, 100 uL into 5 mL BHI, 37C 100 rpm	16	0.239	1.8e+08	1.8e+08		1050000000
9	5	33701	SCI into 1 mL BHI, 100 uL into 5 mL BHI, 37C 100 rpm	20	0.422	345000000	290000000	400000000	1590000000
9	5	33701	SCI into 1 mL BHI, 100 uL into 5 mL BHI, 37C 100 rpm	24	0.608	450000000	4e+08	500000000	9600000000
9	5	33701	SCI into 1 mL BHI, 100 uL into 5 mL BHI, 37C 100 rpm	40	1.345	750000000	600000000	900000000		13681320000	10.1361
9	6	33701	SCI into 1 mL BHI, 100 uL into 5 mL BHI, 37C 100 rpm	0		310000	310000		1460000
9	6	33701	SCI into 1 mL BHI, 100 uL into 5 mL BHI, 37C 100 rpm	4		420000	340000	500000	4940000
9	6	33701	SCI into 1 mL BHI, 100 uL into 5 mL BHI, 37C 100 rpm	8		2050000	2100000	2e+06	118100000
9	6	33701	SCI into 1 mL BHI, 100 uL into 5 mL BHI, 37C 100 rpm	12		57000000	3.4e+07	80000000		124500000	8.09517	1.13674
9	8	33701	SCI into 1 mL BHI, 100 uL into 5 mL BHI, 37C 100 rpm	0		895000	890000	900000	2350000
9	8	33701	SCI into 1 mL BHI, 100 uL into 5 mL BHI, 37C 100 rpm	4		280000	280000		12160000
9	8	33701	SCI into 1 mL BHI, 100 uL into 5 mL BHI, 37C 100 rpm	8		5800000	4600000	7e+06	73600000
9	8	33701	SCI into 1 mL BHI, 100 uL into 5 mL BHI, 37C 100 rpm	12		3.1e+07	4.2e+07	20000000		88110000	7.94503	1.18591
9	9	33701	SCI into 1 mL BHI, 100 uL into 5 mL BHI, 37C 100 rpm	0		395000	390000	400000	1990000
9	9	33701	SCI into 1 mL BHI, 100 uL into 5 mL BHI, 37C 100 rpm	4		600000		600000	.
9	9	33701	SCI into 1 mL BHI, 100 uL into 5 mL BHI, 37C 100 rpm	8		.	.	.	.
9	9	33701	SCI into 1 mL BHI, 100 uL into 5 mL BHI, 37C 100 rpm	12		.	.	.		.	#VALUE!	.
10	2	33701 pc	SCI into 1 mL BHI, 100 uL into 5 mL BHI, 37C 100 rpm	0	-0.007	600000	600000		1.4448e+09
10	2	33701 pc	SCI into 1 mL BHI, 100 uL into 5 mL BHI, 37C 100 rpm	16	0.339	1.8e+08	1.8e+08		1020000000
10	2	33701 pc	SCI into 1 mL BHI, 100 uL into 5 mL BHI, 37C 100 rpm	20	0.548	330000000	330000000		1080000000
10	2	33701 pc	SCI into 1 mL BHI, 100 uL into 5 mL BHI, 37C 100 rpm	24	0.78	210000000	2.2e+08	200000000	5120000000
10	2	33701 pc	SCI into 1 mL BHI, 100 uL into 5 mL BHI, 37C 100 rpm	40	1.629	430000000	4.6e+08	400000000		8664800000	9.93776
10	4	33701 pc	SCI into 1 mL BHI, 100 uL into 5 mL BHI, 37C 100 rpm	0	0	275000	250000	300000	1402200000
10	4	33701 pc	SCI into 1 mL BHI, 100 uL into 5 mL BHI, 37C 100 rpm	16	0.282	175000000	150000000	200000000	1020000000
10	4	33701 pc	SCI into 1 mL BHI, 100 uL into 5 mL BHI, 37C 100 rpm	20	0.451	335000000	270000000	400000000	1070000000
10	4	33701 pc	SCI into 1 mL BHI, 100 uL into 5 mL BHI, 37C 100 rpm	24	0.652	200000000	300000000	100000000	6080000000
10	4	33701 pc	SCI into 1 mL BHI, 100 uL into 5 mL BHI, 37C 100 rpm	40	0.912	560000000	5.2e+08	600000000		9572200000	9.98101
10	5	33701 pc	SCI into 1 mL BHI, 100 uL into 5 mL BHI, 37C 100 rpm	0	0.004	725000	550000	900000	2485800000
10	5	33701 pc	SCI into 1 mL BHI, 100 uL into 5 mL BHI, 37C 100 rpm	16	0.428	310000000	2.2e+08	400000000	1250000000
10	5	33701 pc	SCI into 1 mL BHI, 100 uL into 5 mL BHI, 37C 100 rpm	20	0.634	315000000	330000000	300000000	1370000000
10	5	33701 pc	SCI into 1 mL BHI, 100 uL into 5 mL BHI, 37C 100 rpm	24	0.862	370000000	340000000	400000000	7480000000
10	5	33701 pc	SCI into 1 mL BHI, 100 uL into 5 mL BHI, 37C 100 rpm	40	1.475	565000000	330000000	800000000		12585800000	10.0999
10	6	33701 pc	SCI into 1 mL BHI, 100 uL into 5 mL BHI, 37C 100 rpm	0		350000	300000	400000	1280000
10	6	33701 pc	SCI into 1 mL BHI, 100 uL into 5 mL BHI, 37C 100 rpm	4		290000	180000	400000	7.08e+06
10	6	33701 pc	SCI into 1 mL BHI, 100 uL into 5 mL BHI, 37C 100 rpm	8		3.25e+06	3.5e+06	3e+06	122500000
10	6	33701 pc	SCI into 1 mL BHI, 100 uL into 5 mL BHI, 37C 100 rpm	12		58000000	4.6e+07	70000000		130860000	8.11681	1.05355
10	7	33701 pc	SCI into 1 mL BHI, 100 uL into 5 mL BHI, 37C 100 rpm	0		600000		600000	2370000
10	7	33701 pc	SCI into 1 mL BHI, 100 uL into 5 mL BHI, 37C 100 rpm	4		585000	370000	800000	10570000
10	7	33701 pc	SCI into 1 mL BHI, 100 uL into 5 mL BHI, 37C 100 rpm	8		4700000	4400000	5e+06	1.194e+08
10	7	33701 pc	SCI into 1 mL BHI, 100 uL into 5 mL BHI, 37C 100 rpm	12		5.5e+07	5e+07	6e+07		1.3234e+08	8.12169	1.22858
10	8	33701 pc	SCI into 1 mL BHI, 100 uL into 5 mL BHI, 37C 100 rpm	0		435000	370000	500000	2270000
10	8	33701 pc	SCI into 1 mL BHI, 100 uL into 5 mL BHI, 37C 100 rpm	4		700000		700000	1.51e+07
10	8	33701 pc	SCI into 1 mL BHI, 100 uL into 5 mL BHI, 37C 100 rpm	8		6.85e+06	3.7e+06	1e+07	1.567e+08
10	8	33701 pc	SCI into 1 mL BHI, 100 uL into 5 mL BHI, 37C 100 rpm	12		7.15e+07	5.3e+07	9e+07		1.7407e+08	8.24072	1.20657
10	9	33701 pc	SCI into 1 mL BHI, 100 uL into 5 mL BHI, 37C 100 rpm	0		255000	310000	200000	950000
10	9	33701 pc	SCI into 1 mL BHI, 100 uL into 5 mL BHI, 37C 100 rpm	4		220000	240000	200000	.
10	9	33701 pc	SCI into 1 mL BHI, 100 uL into 5 mL BHI, 37C 100 rpm	8		.	.	.	.
10	9	33701 pc	SCI into 1 mL BHI, 100 uL into 5 mL BHI, 37C 100 rpm	12		.	.	.		.	#VALUE!	.
11	1	WSU006	SCI into 1 mL BHI, 100 uL into 5 mL BHI, 37C 100 rpm	0	-0.021	700000	700000		965600000
11	1	WSU006	SCI into 1 mL BHI, 100 uL into 5 mL BHI, 37C 100 rpm	16	0.358	120000000	140000000	100000000	460000000
11	1	WSU006	SCI into 1 mL BHI, 100 uL into 5 mL BHI, 37C 100 rpm	20	0.481	110000000	20000000	200000000	590000000
11	1	WSU006	SCI into 1 mL BHI, 100 uL into 5 mL BHI, 37C 100 rpm	24	0.708	185000000	70000000	300000000	2120000000
11	1	WSU006	SCI into 1 mL BHI, 100 uL into 5 mL BHI, 37C 100 rpm	40	1.907	80000000	6e+07	100000000		4135600000	9.61654
11	2	WSU006	SCI into 1 mL BHI, 100 uL into 5 mL BHI, 37C 100 rpm	0	0.012	325000	350000	300000	1162600000
11	2	WSU006	SCI into 1 mL BHI, 100 uL into 5 mL BHI, 37C 100 rpm	16	0.447	145000000	9e+07	200000000	1080000000
11	2	WSU006	SCI into 1 mL BHI, 100 uL into 5 mL BHI, 37C 100 rpm	20	0.687	395000000	3.9e+08	400000000	1010000000
11	2	WSU006	SCI into 1 mL BHI, 100 uL into 5 mL BHI, 37C 100 rpm	24	1.056	1.1e+08	1.1e+08		1.6e+09
11	2	WSU006	SCI into 1 mL BHI, 100 uL into 5 mL BHI, 37C 100 rpm	40	2.022	9e+07	9e+07			4852600000	9.68597
11	3	WSU006	SCI into 1 mL BHI, 100 uL into 5 mL BHI, 37C 100 rpm	0	0.006	175000	250000	100000	8.014e+08
11	3	WSU006	SCI into 1 mL BHI, 100 uL into 5 mL BHI, 37C 100 rpm	16	0.291	1e+08	1e+08		710000000
11	3	WSU006	SCI into 1 mL BHI, 100 uL into 5 mL BHI, 37C 100 rpm	20	0.431	255000000	1.1e+08	400000000	770000000
11	3	WSU006	SCI into 1 mL BHI, 100 uL into 5 mL BHI, 37C 100 rpm	24	0.622	1.3e+08	1.3e+08		1880000000
11	3	WSU006	SCI into 1 mL BHI, 100 uL into 5 mL BHI, 37C 100 rpm	40	1.611	105000000	1.1e+08	100000000		4161400000	9.61924
11	4	WSU006	SCI into 1 mL BHI, 100 uL into 5 mL BHI, 37C 100 rpm	0		160000	220000	100000	890000
11	4	WSU006	SCI into 1 mL BHI, 100 uL into 5 mL BHI, 37C 100 rpm	4		285000	170000	400000	4770000
11	4	WSU006	SCI into 1 mL BHI, 100 uL into 5 mL BHI, 37C 100 rpm	8		2100000	1200000	3e+06	40200000
11	4	WSU006	SCI into 1 mL BHI, 100 uL into 5 mL BHI, 37C 100 rpm	12		18000000	1.6e+07	20000000		45860000	7.66143	1.34648
11	5	WSU006	SCI into 1 mL BHI, 100 uL into 5 mL BHI, 37C 100 rpm	0		815000	330000	1300000	2250000
11	5	WSU006	SCI into 1 mL BHI, 100 uL into 5 mL BHI, 37C 100 rpm	4		310000	310000		1.132e+07
11	5	WSU006	SCI into 1 mL BHI, 100 uL into 5 mL BHI, 37C 100 rpm	8		5.35e+06	3.7e+06	7e+06	8.67e+07
11	5	WSU006	SCI into 1 mL BHI, 100 uL into 5 mL BHI, 37C 100 rpm	12		3.8e+07	4.6e+07	3e+07		1.0027e+08	8.00117	1.1608
11	6	WSU006	SCI into 1 mL BHI, 100 uL into 5 mL BHI, 37C 100 rpm	0		120000	140000	100000	630000
11	6	WSU006	SCI into 1 mL BHI, 100 uL into 5 mL BHI, 37C 100 rpm	4		195000	90000	300000	3.99e+06
11	6	WSU006	SCI into 1 mL BHI, 100 uL into 5 mL BHI, 37C 100 rpm	8		1.8e+06	1.6e+06	2e+06	4.26e+07
11	6	WSU006	SCI into 1 mL BHI, 100 uL into 5 mL BHI, 37C 100 rpm	12		1.95e+07	9e+06	3e+07		4.722e+07	7.67413	1.21212
11	8	WSU006	SCI into 1 mL BHI, 100 uL into 5 mL BHI, 37C 100 rpm	0		215000			1040000
11	8	WSU006	SCI into 1 mL BHI, 100 uL into 5 mL BHI, 37C 100 rpm	4		305000			7410000
11	8	WSU006	SCI into 1 mL BHI, 100 uL into 5 mL BHI, 37C 100 rpm	8		3400000			8.08e+07
11	8	WSU006	SCI into 1 mL BHI, 100 uL into 5 mL BHI, 37C 100 rpm	12		3.7e+07				8.925e+07	7.95061	1.16332
12	1	103S-GFP	SCI into 1 mL BHI, 100 uL into 5 mL BHI, 37C 100 rpm	0	-0.023	255000	310000	200000	1402040000
12	1	103S-GFP	SCI into 1 mL BHI, 100 uL into 5 mL BHI, 37C 100 rpm	16	0.261	175000000	150000000	200000000	500000000
12	1	103S-GFP	SCI into 1 mL BHI, 100 uL into 5 mL BHI, 37C 100 rpm	20	0.391	75000000	5e+07	100000000	820000000
12	1	103S-GFP	SCI into 1 mL BHI, 100 uL into 5 mL BHI, 37C 100 rpm	24	0.59	335000000	270000000	400000000	9080000000
12	1	103S-GFP	SCI into 1 mL BHI, 100 uL into 5 mL BHI, 37C 100 rpm	40	1.508	800000000	800000000			11802040000	10.072
12	2	103S-GFP	SCI into 1 mL BHI, 100 uL into 5 mL BHI, 37C 100 rpm	0	0.009	170000	140000	200000	9.6136e+08
12	2	103S-GFP	SCI into 1 mL BHI, 100 uL into 5 mL BHI, 37C 100 rpm	16	0.201	1.2e+08	1.2e+08		.
12	2	103S-GFP	SCI into 1 mL BHI, 100 uL into 5 mL BHI, 37C 100 rpm	20	.	.	.	.	.
12	2	103S-GFP	SCI into 1 mL BHI, 100 uL into 5 mL BHI, 37C 100 rpm	24	0.445	320000000	140000000	500000000	.
12	2	103S-GFP	SCI into 1 mL BHI, 100 uL into 5 mL BHI, 37C 100 rpm	40	.	.	.	.		8061360000	9.90641
12	4	103S-GFP	SCI into 1 mL BHI, 100 uL into 5 mL BHI, 37C 100 rpm	0	0.001	720000	640000	800000	1125760000
12	4	103S-GFP	SCI into 1 mL BHI, 100 uL into 5 mL BHI, 37C 100 rpm	16	0.24	140000000	140000000		630000000
12	4	103S-GFP	SCI into 1 mL BHI, 100 uL into 5 mL BHI, 37C 100 rpm	20	0.35	175000000	150000000	200000000	810000000
12	4	103S-GFP	SCI into 1 mL BHI, 100 uL into 5 mL BHI, 37C 100 rpm	24	0.437	230000000	160000000	300000000	5640000000
12	4	103S-GFP	SCI into 1 mL BHI, 100 uL into 5 mL BHI, 37C 100 rpm	40	0.792	475000000	3.5e+08	600000000		8205760000	9.91412
12	5	103S-GFP	SCI into 1 mL BHI, 100 uL into 5 mL BHI, 37C 100 rpm	0	0	10000	10000		1720080000
12	5	103S-GFP	SCI into 1 mL BHI, 100 uL into 5 mL BHI, 37C 100 rpm	16	0.192	215000000	1.3e+08	300000000	790000000
12	5	103S-GFP	SCI into 1 mL BHI, 100 uL into 5 mL BHI, 37C 100 rpm	20	0.299	1.8e+08	1.8e+08		770000000
12	5	103S-GFP	SCI into 1 mL BHI, 100 uL into 5 mL BHI, 37C 100 rpm	24	0.425	205000000	2.1e+08	200000000	3.96e+09
12	5	103S-GFP	SCI into 1 mL BHI, 100 uL into 5 mL BHI, 37C 100 rpm	40	0.818	2.9e+08	2.1e+08	3.7e+08		7240080000	9.85974
12	6	103S-GFP	SCI into 1 mL BHI, 100 uL into 5 mL BHI, 37C 100 rpm	0		530000	560000	500000	2430000
12	6	103S-GFP	SCI into 1 mL BHI, 100 uL into 5 mL BHI, 37C 100 rpm	4		685000	470000	900000	11170000
12	6	103S-GFP	SCI into 1 mL BHI, 100 uL into 5 mL BHI, 37C 100 rpm	8		4900000	4800000	5e+06	1.208e+08
12	6	103S-GFP	SCI into 1 mL BHI, 100 uL into 5 mL BHI, 37C 100 rpm	12		5.55e+07	5.1e+07	6e+07		134400000	8.1284	1.27017
12	8	103S-GFP	SCI into 1 mL BHI, 100 uL into 5 mL BHI, 37C 100 rpm	0		485000	370000	600000	1930000
12	8	103S-GFP	SCI into 1 mL BHI, 100 uL into 5 mL BHI, 37C 100 rpm	4		480000	360000	600000	12560000
12	8	103S-GFP	SCI into 1 mL BHI, 100 uL into 5 mL BHI, 37C 100 rpm	8		5800000	4600000	7e+06	57600000
12	8	103S-GFP	SCI into 1 mL BHI, 100 uL into 5 mL BHI, 37C 100 rpm	12		23000000	2.6e+07	20000000		72090000	7.85788	1.44258
12	10	103S-GFP	SCI into 1 mL BHI, 100 uL into 5 mL BHI, 37C 100 rpm	0		270000			1490000
12	10	103S-GFP	SCI into 1 mL BHI, 100 uL into 5 mL BHI, 37C 100 rpm	4		475000			1.065e+07
12	10	103S-GFP	SCI into 1 mL BHI, 100 uL into 5 mL BHI, 37C 100 rpm	8		4.85e+06			7.57e+07
12	10	103S-GFP	SCI into 1 mL BHI, 100 uL into 5 mL BHI, 37C 100 rpm	12		3.3e+07				8.784e+07	7.94369	1.31622
12	11	103S-GFP	SCI into 1 mL BHI, 100 uL into 5 mL BHI, 37C 100 rpm	0		175000			1020000
12	11	103S-GFP	SCI into 1 mL BHI, 100 uL into 5 mL BHI, 37C 100 rpm	4		335000			8470000
12	11	103S-GFP	SCI into 1 mL BHI, 100 uL into 5 mL BHI, 37C 100 rpm	8		3.9e+06			7.38e+07
12	11	103S-GFP	SCI into 1 mL BHI, 100 uL into 5 mL BHI, 37C 100 rpm	12		3.3e+07				8.329e+07	7.92059	1.21609

## Sheet: Generation time data
ORDER	Replicate	Strain	Generation time 4-12 h (h)	Total AUC	log10 AUC
1	5	WSU002	0.917455	8.543e+07	7.93161
1	6	WSU002	.	.	.
1	8	WSU002	0.936237	1.1114e+08	8.04587
1	9	WSU002	0.860134	90020000	7.95434
2	5	WSU003	0.950672	2.5588e+08	8.40804
2	6	WSU003	0.870114	2.4659e+08	8.39198
2	7	WSU003	0.929258	144620000	8.16023
2	8	WSU003	0.879178	.	.
3	5	WSU005	0.808081	2.516e+08	8.40071
3	6	WSU005	0.89821	155510000	8.19176
3	7	WSU005	1.10379	7.962e+07	7.90102
3	8	WSU005	0.89821	1.1064e+08	8.04391
4	5	WSU001	1.18964	105840000	8.02465
4	6	WSU001	0.947376	1.5624e+08	8.19379
4	7	WSU001	1.0018	1.5986e+08	8.20374
4	8	WSU001	0.905935	1.5609e+08	8.19338
5	6	WSU004	1.08006	97650000	7.98967
5	7	WSU004	1.06654	329600000	8.51799
5	8	WSU004	0.964668	2.0258e+08	8.3066
6	6	WSU007	1.18005	22850000	7.35889
6	7	WSU007	1.04661	30450000	7.48359
6	8	WSU007	0.988019	5.508e+07	7.74099
6	9	WSU007	0.958563	7.798e+07	7.89198
6	11	WSU007	1.07045	1.6989e+08	8.23017
6	12	WSU007	.	.	.
7	5	103+	1.37759	2.0444e+08	8.31057
7	8	103+	.	.	.
7	9	103+	0.970736	132320000	8.12163
7	10	103+	1.28535	78930000	7.89724
7	11	103+	1.02463	83720000	7.92283
7	12	103+	0.927839	136550000	8.13529
8	5	UKVDL206	1.05355	1.9328e+08	8.28619
8	6	UKVDL206	1.22081	91920000	7.96341
8	8	UKVDL206	1.36168	1.8946e+08	8.27752
8	9	UKVDL206	0.96262	355740000	8.55113
8	10	UKVDL206	1.04854	198960000	8.29877
9	6	33701	1.13674	124500000	8.09517
9	8	33701	1.18591	88110000	7.94503
9	9	33701	.	.	.
10	6	33701 pc	1.05355	130860000	8.11681
10	7	33701 pc	1.22858	1.3234e+08	8.12169
10	8	33701 pc	1.20657	1.7407e+08	8.24072
10	9	33701 pc	.	.	.
11	4	WSU006	1.34648	45860000	7.66143
11	5	WSU006	1.1608	1.0027e+08	8.00117
11	6	WSU006	1.21212	4.722e+07	7.67413
11	8	WSU006	1.16332	8.925e+07	7.95061
12	6	103S-GFP	1.27017	134400000	8.1284
12	8	103S-GFP	1.44258	72090000	7.85788
12	10	103S-GFP	1.31622	8.784e+07	7.94369
12	11	103S-GFP	1.21609	8.329e+07	7.92059

## Sheet: Solid media growth raw data
ORDER	Strain	Date	replicate	Time post incoculation (h)	Colony Size (mm)
1	WSU002	2018-Jul-17	1	20	0
1	WSU002	2018-Jul-17	2	20	0
1	WSU002	2018-Jul-17	3	20	.
1	WSU002	2018-Jul-17	4	20	.
1	WSU002	2018-Jul-17	5	20	.
1	WSU002	2018-Jul-17	1	24	0.5
1	WSU002	2018-Jul-17	2	24	0
1	WSU002	2018-Jul-17	3	24	1
1	WSU002	2018-Jul-17	4	24	1.5
1	WSU002	2018-Jul-17	5	24	1
1	WSU002	2018-Nov-28	7	24	1.5
1	WSU002	2018-Nov-28	8	24	1
1	WSU002	2018-Nov-28	9	24	1
1	WSU002	2018-Nov-28	10	24	1
1	WSU002	2018-Nov-28	11	24	1
1	WSU002	2018-Nov-28	12	24	0.3
1	WSU002	2018-Nov-28	13	24	0
1	WSU002	2018-Jul-18	1	28	.
1	WSU002	2018-Jul-18	2	28	.
1	WSU002	2018-Jul-18	3	28	2
1	WSU002	2018-Jul-18	4	28	2.5
1	WSU002	2018-Jul-18	5	28	2
1	WSU002	2018-Jul-18	1	32	.
1	WSU002	2018-Jul-18	2	32	.
1	WSU002	2018-Jul-18	3	32	3
1	WSU002	2018-Jul-18	4	32	4
1	WSU002	2018-Jul-18	5	32	3
1	WSU002	2018-Aug-01	6	32	3
1	WSU002	2018-Jul-18	1	36	.
1	WSU002	2018-Jul-18	2	36	.
1	WSU002	2018-Jul-18	3	36	4
1	WSU002	2018-Jul-18	4	36	4
1	WSU002	2018-Jul-18	5	36	3.5
1	WSU002	2018-Jul-19	1	40	4
1	WSU002	2018-Jul-19	2	40	5
1	WSU002	2018-Jul-19	3	40	.
1	WSU002	2018-Jul-19	4	40	.
1	WSU002	2018-Jul-19	5	40	.
1	WSU002	2018-Nov-29	7	40	4
1	WSU002	2018-Nov-29	8	40	.
1	WSU002	2018-Nov-29	9	40	3.5
1	WSU002	2018-Nov-29	10	40	3.5
1	WSU002	2018-Nov-29	11	40	3.5
1	WSU002	2018-Nov-29	12	40	3
1	WSU002	2018-Nov-29	13	40	2.5
1	WSU002	2018-Jul-19	1	44	4
1	WSU002	2018-Jul-19	2	44	5
1	WSU002	2018-Jul-19	3	44	.
1	WSU002	2018-Jul-19	4	44	.
1	WSU002	2018-Jul-19	5	44	.
1	WSU002	2018-Nov-29	7	44	4.5
1	WSU002	2018-Nov-29	8	44	.
1	WSU002	2018-Nov-29	9	44	4
1	WSU002	2018-Nov-29	10	44	4
1	WSU002	2018-Nov-29	11	44	4
1	WSU002	2018-Nov-29	12	44	3.5
1	WSU002	2018-Nov-29	13	44	3.5
1	WSU002	2018-Jul-19	1	48	4.5
1	WSU002	2018-Jul-19	2	48	5
1	WSU002	2018-Jul-19	3	48	.
1	WSU002	2018-Jul-19	4	48	.
1	WSU002	2018-Jul-19	5	48	.
1	WSU002	2018-Aug-02	6	48	5.5
1	WSU002	2018-Nov-29	7	48	5
1	WSU002	2018-Nov-29	8	48	.
1	WSU002	2018-Nov-29	9	48	4
1	WSU002	2018-Nov-29	10	48	4.5
1	WSU002	2018-Nov-29	11	48	4.5
1	WSU002	2018-Nov-29	12	48	4
1	WSU002	2018-Nov-29	13	48	4
2	WSU003	2018-Jul-17	1	20	0
2	WSU003	2018-Jul-17	2	20	0
2	WSU003	2018-Jul-17	3	20	.
2	WSU003	2018-Jul-17	4	20	.
2	WSU003	2018-Jul-17	1	24	0
2	WSU003	2018-Jul-17	2	24	0
2	WSU003	2018-Jul-17	3	24	1
2	WSU003	2018-Jul-17	4	24	0.75
2	WSU003	2018-Nov-28	8	24	1.5
2	WSU003	2018-Nov-28	9	24	1
2	WSU003	2018-Nov-28	10	24	0.5
2	WSU003	2018-Jul-18	1	28	.
2	WSU003	2018-Jul-18	2	28	.
2	WSU003	2018-Jul-18	3	28	2
2	WSU003	2018-Jul-18	4	28	1.5
2	WSU003	2018-Jul-18	1	32	.
2	WSU003	2018-Jul-18	2	32	.
2	WSU003	2018-Jul-18	3	32	3
2	WSU003	2018-Jul-18	4	32	2.5
2	WSU003	2018-Aug-01	5	32	3
2	WSU003	2018-Aug-01	6	32	2
2	WSU003	2018-Aug-01	7	32	2.5
2	WSU003	2018-Jul-18	1	36	.
2	WSU003	2018-Jul-18	2	36	.
2	WSU003	2018-Jul-18	3	36	3
2	WSU003	2018-Jul-18	4	36	3
2	WSU003	2018-Jul-19	1	40	2
2	WSU003	2018-Jul-19	2	40	3
2	WSU003	2018-Jul-19	3	40	.
2	WSU003	2018-Jul-19	4	40	.
2	WSU003	2018-Nov-29	8	40	3
2	WSU003	2018-Nov-29	9	40	2.5
2	WSU003	2018-Nov-29	10	40	2
2	WSU003	2018-Jul-19	1	44	2.5
2	WSU003	2018-Jul-19	2	44	3
2	WSU003	2018-Jul-19	3	44	.
2	WSU003	2018-Jul-19	4	44	.
2	WSU003	2018-Nov-29	8	44	3.5
2	WSU003	2018-Nov-29	9	44	2.5
2	WSU003	2018-Nov-29	10	44	3
2	WSU003	2018-Jul-19	1	48	3
2	WSU003	2018-Jul-19	2	48	3
2	WSU003	2018-Jul-19	3	48	.
2	WSU003	2018-Jul-19	4	48	.
2	WSU003	2018-Aug-02	5	48	4
2	WSU003	2018-Aug-02	6	48	4
2	WSU003	2018-Aug-02	7	48	5
2	WSU003	2018-Nov-29	8	48	3.5
2	WSU003	2018-Nov-29	9	48	2.5
2	WSU003	2018-Nov-29	10	48	3
3	WSU005	2018-Jul-17	1	20	.
3	WSU005	2018-Jul-17	2	20	.
3	WSU005	2018-Jul-17	3	20	.
3	WSU005	2018-Jul-17	4	20	.
3	WSU005	2018-Jul-17	1	24	1
3	WSU005	2018-Jul-17	2	24	1.5
3	WSU005	2018-Jul-17	3	24	2
3	WSU005	2018-Jul-17	4	24	1
3	WSU005	2018-Nov-28	9	24	1.5
3	WSU005	2018-Nov-28	10	24	1
3	WSU005	2018-Nov-28	11	24	0.4
3	WSU005	2018-Nov-28	12	24	1
3	WSU005	2018-Nov-28	13	24	1.5
3	WSU005	2018-Nov-28	14	24	1
3	WSU005	2018-Jul-18	1	28	2
3	WSU005	2018-Jul-18	2	28	2
3	WSU005	2018-Jul-18	3	28	2.5
3	WSU005	2018-Jul-18	4	28	2
3	WSU005	2018-Jul-18	1	32	3
3	WSU005	2018-Jul-18	2	32	3
3	WSU005	2018-Jul-18	3	32	3
3	WSU005	2018-Jul-18	4	32	2.5
3	WSU005	2018-Aug-01	5	32	2
3	WSU005	2018-Aug-01	6	32	2.5
3	WSU005	2018-Aug-01	7	32	2
3	WSU005	2018-Aug-01	8	32	2
3	WSU005	2018-Jul-18	1	36	3.5
3	WSU005	2018-Jul-18	2	36	3.5
3	WSU005	2018-Jul-18	3	36	3
3	WSU005	2018-Jul-18	4	36	3
3	WSU005	2018-Jul-19	1	40	.
3	WSU005	2018-Jul-19	2	40	.
3	WSU005	2018-Jul-19	3	40	.
3	WSU005	2018-Jul-19	4	40	.
3	WSU005	2018-Nov-29	9	40	4
3	WSU005	2018-Nov-29	10	40	3.5
3	WSU005	2018-Nov-29	11	40	3
3	WSU005	2018-Nov-29	12	40	3
3	WSU005	2018-Nov-29	13	40	3.5
3	WSU005	2018-Nov-29	14	40	3
3	WSU005	2018-Jul-19	1	44	.
3	WSU005	2018-Jul-19	2	44	.
3	WSU005	2018-Jul-19	3	44	.
3	WSU005	2018-Jul-19	4	44	.
3	WSU005	2018-Nov-29	9	44	4
3	WSU005	2018-Nov-29	10	44	4
3	WSU005	2018-Nov-29	11	44	3.5
3	WSU005	2018-Nov-29	12	44	3
3	WSU005	2018-Nov-29	13	44	3.5
3	WSU005	2018-Nov-29	14	44	3.5
3	WSU005	2018-Jul-19	1	48	.
3	WSU005	2018-Jul-19	2	48	.
3	WSU005	2018-Jul-19	3	48	.
3	WSU005	2018-Jul-19	4	48	.
3	WSU005	2018-Aug-02	5	48	4.5
3	WSU005	2018-Aug-02	6	48	5
3	WSU005	2018-Aug-02	7	48	4.5
3	WSU005	2018-Aug-02	8	48	3
3	WSU005	2018-Nov-29	9	48	4
3	WSU005	2018-Nov-29	10	48	4
3	WSU005	2018-Nov-29	11	48	3.5
3	WSU005	2018-Nov-29	12	48	3.5
3	WSU005	2018-Nov-29	13	48	3.5
3	WSU005	2018-Nov-29	14	48	4
4	WSU001	2018-Jul-17	1	20	0
4	WSU001	2018-Jul-17	2	20	0
4	WSU001	2018-Jul-17	3	20	0
4	WSU001	2018-Jul-17	4	20	.
4	WSU001	2018-Jul-17	5	20	.
4	WSU001	2018-Jul-17	1	24	0
4	WSU001	2018-Jul-17	2	24	0
4	WSU001	2018-Jul-17	3	24	0
4	WSU001	2018-Jul-17	4	24	1
4	WSU001	2018-Jul-17	5	24	2
4	WSU001	2018-Nov-28	8	24	0.5
4	WSU001	2018-Nov-28	9	24	0.5
4	WSU001	2018-Nov-28	10	24	0.3
4	WSU001	2018-Jul-18	1	28	.
4	WSU001	2018-Jul-18	2	28	.
4	WSU001	2018-Jul-18	3	28	.
4	WSU001	2018-Jul-18	4	28	1.5
4	WSU001	2018-Jul-18	5	28	3
4	WSU001	2018-Jul-18	1	32	.
4	WSU001	2018-Jul-18	2	32	.
4	WSU001	2018-Jul-18	3	32	.
4	WSU001	2018-Jul-18	4	32	1.5
4	WSU001	2018-Jul-18	5	32	3
4	WSU001	2018-Aug-01	6	32	2
4	WSU001	2018-Aug-01	7	32	2
4	WSU001	2018-Jul-18	1	36	.
4	WSU001	2018-Jul-18	2	36	.
4	WSU001	2018-Jul-18	3	36	.
4	WSU001	2018-Jul-18	4	36	1.5
4	WSU001	2018-Jul-18	5	36	3
4	WSU001	2018-Jul-19	1	40	3
4	WSU001	2018-Jul-19	2	40	3.5
4	WSU001	2018-Jul-19	3	40	3
4	WSU001	2018-Jul-19	4	40	.
4	WSU001	2018-Jul-19	5	40	.
4	WSU001	2018-Nov-29	8	40	2.5
4	WSU001	2018-Nov-29	9	40	2.5
4	WSU001	2018-Nov-29	10	40	2.5
4	WSU001	2018-Jul-19	1	44	3.5
4	WSU001	2018-Jul-19	2	44	4
4	WSU001	2018-Jul-19	3	44	4
4	WSU001	2018-Jul-19	4	44	.
4	WSU001	2018-Jul-19	5	44	.
4	WSU001	2018-Nov-29	8	44	3
4	WSU001	2018-Nov-29	9	44	3
4	WSU001	2018-Nov-29	10	44	3
4	WSU001	2018-Jul-19	1	48	4
4	WSU001	2018-Jul-19	2	48	4
4	WSU001	2018-Jul-19	3	48	4
4	WSU001	2018-Jul-19	4	48	.
4	WSU001	2018-Jul-19	5	48	.
4	WSU001	2018-Aug-02	6	48	3
4	WSU001	2018-Aug-02	7	48	4.5
4	WSU001	2018-Nov-29	8	48	3.5
4	WSU001	2018-Nov-29	9	48	3.5
4	WSU001	2018-Nov-29	10	48	3.5
5	WSU004	2018-Jul-17	1	20	0
5	WSU004	2018-Jul-17	2	20	0
5	WSU004	2018-Jul-17	3	20	.
5	WSU004	2018-Jul-17	4	20	.
5	WSU004	2018-Jul-17	1	24	0
5	WSU004	2018-Jul-17	2	24	1
5	WSU004	2018-Jul-17	3	24	1
5	WSU004	2018-Jul-17	4	24	1
5	WSU004	2018-Nov-28	7	24	1
5	WSU004	2018-Nov-28	8	24	0.3
5	WSU004	2018-Nov-28	9	24	0
5	WSU004	2018-Jul-18	1	28	.
5	WSU004	2018-Jul-18	2	28	.
5	WSU004	2018-Jul-18	3	28	2
5	WSU004	2018-Jul-18	4	28	2.5
5	WSU004	2018-Jul-18	1	32	.
5	WSU004	2018-Jul-18	2	32	.
5	WSU004	2018-Jul-18	3	32	3
5	WSU004	2018-Jul-18	4	32	3.5
5	WSU004	2018-Aug-01	5	32	2
5	WSU004	2018-Aug-01	6	32	1
5	WSU004	2018-Jul-18	1	36	.
5	WSU004	2018-Jul-18	2	36	.
5	WSU004	2018-Jul-18	3	36	4
5	WSU004	2018-Jul-18	4	36	4.5
5	WSU004	2018-Jul-19	1	40	6
5	WSU004	2018-Jul-19	2	40	5
5	WSU004	2018-Jul-19	3	40	.
5	WSU004	2018-Jul-19	4	40	.
5	WSU004	2018-Nov-29	7	40	4
5	WSU004	2018-Nov-29	8	40	3.5
5	WSU004	2018-Nov-29	9	40	3
5	WSU004	2018-Jul-19	1	44	.
5	WSU004	2018-Jul-19	2	44	5.5
5	WSU004	2018-Jul-19	3	44	.
5	WSU004	2018-Jul-19	4	44	.
5	WSU004	2018-Nov-29	7	44	5
5	WSU004	2018-Nov-29	8	44	4.5
5	WSU004	2018-Nov-29	9	44	5
5	WSU004	2018-Jul-19	1	48	.
5	WSU004	2018-Jul-19	2	48	5.5
5	WSU004	2018-Jul-19	3	48	.
5	WSU004	2018-Jul-19	4	48	.
5	WSU004	2018-Aug-02	5	48	5
5	WSU004	2018-Aug-02	6	48	5
5	WSU004	2018-Nov-29	7	48	5
5	WSU004	2018-Nov-29	8	48	5
5	WSU004	2018-Nov-29	9	48	5.5
6	WSU007	2018-Jul-17	1	16	0
6	WSU007	2018-Jul-17	2	16	0
6	WSU007	2018-Jul-17	3	16	.
6	WSU007	2018-Jul-17	4	16	.
6	WSU007	2018-Jul-17	1	20	0
6	WSU007	2018-Jul-17	2	20	0
6	WSU007	2018-Jul-17	3	20	.
6	WSU007	2018-Jul-17	4	20	.
6	WSU007	2018-Jul-17	1	24	0
6	WSU007	2018-Jul-17	2	24	0
6	WSU007	2018-Jul-17	3	24	0.5
6	WSU007	2018-Jul-17	4	24	0
6	WSU007	2018-Nov-28	8	24	0.5
6	WSU007	2018-Nov-28	9	24	1
6	WSU007	2018-Nov-28	10	24	0.5
6	WSU007	2018-Nov-28	11	24	0.5
6	WSU007	2018-Nov-28	12	24	1
6	WSU007	2018-Nov-28	13	24	0.5
6	WSU007	2018-Nov-28	14	24	1
6	WSU007	2018-Nov-28	15	24	1
6	WSU007	2018-Nov-28	16	24	0.5
6	WSU007	2018-Jul-18	1	28	.
6	WSU007	2018-Jul-18	2	28	.
6	WSU007	2018-Jul-18	3	28	1.5
6	WSU007	2018-Jul-18	4	28	1
6	WSU007	2018-Jul-18	1	32	.
6	WSU007	2018-Jul-18	2	32	.
6	WSU007	2018-Jul-18	3	32	3
6	WSU007	2018-Jul-18	4	32	2
6	WSU007	2018-Aug-01	5	32	2
6	WSU007	2018-Aug-01	6	32	2
6	WSU007	2018-Aug-01	7	32	1.5
6	WSU007	2018-Jul-18	1	36	.
6	WSU007	2018-Jul-18	2	36	.
6	WSU007	2018-Jul-18	3	36	4
6	WSU007	2018-Jul-18	4	36	2.5
6	WSU007	2018-Jul-19	1	40	4
6	WSU007	2018-Jul-19	2	40	4
6	WSU007	2018-Jul-19	3	40	.
6	WSU007	2018-Jul-19	4	40	.
6	WSU007	2018-Nov-29	8	40	3
6	WSU007	2018-Nov-29	9	40	3.5
6	WSU007	2018-Nov-29	10	40	2.5
6	WSU007	2018-Nov-29	11	40	3
6	WSU007	2018-Nov-29	12	40	2.5
6	WSU007	2018-Nov-29	13	40	3
6	WSU007	2018-Nov-29	14	40	3
6	WSU007	2018-Nov-29	15	40	3
6	WSU007	2018-Nov-29	16	40	2.5
6	WSU007	2018-Jul-19	1	44	5
6	WSU007	2018-Jul-19	2	44	4.5
6	WSU007	2018-Jul-19	3	44	.
6	WSU007	2018-Jul-19	4	44	.
6	WSU007	2018-Nov-29	8	44	3.5
6	WSU007	2018-Nov-29	9	44	3.5
6	WSU007	2018-Nov-29	10	44	2.5
6	WSU007	2018-Nov-29	11	44	3.5
6	WSU007	2018-Nov-29	12	44	3.5
6	WSU007	2018-Nov-29	13	44	3.5
6	WSU007	2018-Nov-29	14	44	3
6	WSU007	2018-Nov-29	15	44	3
6	WSU007	2018-Nov-29	16	44	3
6	WSU007	2018-Jul-19	1	48	5
6	WSU007	2018-Jul-19	2	48	5
6	WSU007	2018-Jul-19	3	48	.
6	WSU007	2018-Jul-19	4	48	.
6	WSU007	2018-Aug-02	5	48	4.5
6	WSU007	2018-Aug-02	6	48	4
6	WSU007	2018-Aug-02	7	48	3
6	WSU007	2018-Nov-29	8	48	3.5
6	WSU007	2018-Nov-29	9	48	4
6	WSU007	2018-Nov-29	10	48	2.5
6	WSU007	2018-Nov-29	11	48	3.5
6	WSU007	2018-Nov-29	12	48	3.5
6	WSU007	2018-Nov-29	13	48	4.5
6	WSU007	2018-Nov-29	14	48	4
6	WSU007	2018-Nov-29	15	48	3.5
6	WSU007	2018-Nov-29	16	48	3.5
7	103+	2018-Jul-17	1	20	0
7	103+	2018-Jul-17	2	20	0
7	103+	2018-Jul-17	3	20	0
7	103+	2018-Jul-17	4	20	.
7	103+	2018-Jul-17	5	20	.
7	103+	2018-Jul-17	1	24	0
7	103+	2018-Jul-17	2	24	0
7	103+	2018-Jul-17	3	24	0
7	103+	2018-Jul-17	4	24	0.5
7	103+	2018-Jul-17	5	24	0
7	103+	2018-Nov-28	9	24	0
7	103+	2018-Nov-28	10	24	0
7	103+	2018-Nov-28	11	24	0
7	103+	2018-Jul-18	1	28	.
7	103+	2018-Jul-18	2	28	.
7	103+	2018-Jul-18	3	28	.
7	103+	2018-Jul-18	4	28	1
7	103+	2018-Jul-18	5	28	0.5
7	103+	2018-Jul-18	1	32	.
7	103+	2018-Jul-18	2	32	.
7	103+	2018-Jul-18	3	32	.
7	103+	2018-Jul-18	4	32	2
7	103+	2018-Jul-18	5	32	1
7	103+	2018-Aug-01	6	32	0
7	103+	2018-Aug-01	7	32	0
7	103+	2018-Aug-01	8	32	0
7	103+	2018-Jul-18	1	36	.
7	103+	2018-Jul-18	2	36	.
7	103+	2018-Jul-18	3	36	.
7	103+	2018-Jul-18	4	36	3
7	103+	2018-Jul-18	5	36	2
7	103+	2018-Jul-19	1	40	3
7	103+	2018-Jul-19	2	40	2
7	103+	2018-Jul-19	3	40	4
7	103+	2018-Jul-19	4	40	.
7	103+	2018-Jul-19	5	40	.
7	103+	2018-Nov-29	9	40	1.5
7	103+	2018-Nov-29	10	40	2
7	103+	2018-Nov-29	11	40	1.5
7	103+	2018-Jul-19	1	44	4
7	103+	2018-Jul-19	2	44	2.5
7	103+	2018-Jul-19	3	44	5
7	103+	2018-Jul-19	4	44	.
7	103+	2018-Jul-19	5	44	.
7	103+	2018-Nov-29	9	44	2
7	103+	2018-Nov-29	10	44	2.5
7	103+	2018-Nov-29	11	44	2.5
7	103+	2018-Jul-19	1	48	4
7	103+	2018-Jul-19	2	48	3
7	103+	2018-Jul-19	3	48	5
7	103+	2018-Jul-19	4	48	.
7	103+	2018-Jul-19	5	48	.
7	103+	2018-Aug-02	6	48	3
7	103+	2018-Aug-02	7	48	3
7	103+	2018-Aug-02	8	48	2
7	103+	2018-Nov-29	9	48	2
7	103+	2018-Nov-29	10	48	3
7	103+	2018-Nov-29	11	48	2.5
8	UKVDL206	2018-Jul-17	1	20	0
8	UKVDL206	2018-Jul-17	2	20	0
8	UKVDL206	2018-Jul-17	3	20	0
8	UKVDL206	2018-Jul-17	4	20	.
8	UKVDL206	2018-Jul-17	5	20	.
8	UKVDL206	2018-Jul-17	1	24	0
8	UKVDL206	2018-Jul-17	2	24	0
8	UKVDL206	2018-Jul-17	3	24	0
8	UKVDL206	2018-Jul-17	4	24	0
8	UKVDL206	2018-Jul-17	5	24	0
8	UKVDL206	2018-Nov-28	8	24	1
8	UKVDL206	2018-Nov-28	9	24	1
8	UKVDL206	2018-Nov-28	10	24	1
8	UKVDL206	2018-Jul-18	1	28	.
8	UKVDL206	2018-Jul-18	2	28	.
8	UKVDL206	2018-Jul-18	3	28	.
8	UKVDL206	2018-Jul-18	4	28	0.5
8	UKVDL206	2018-Jul-18	5	28	1
8	UKVDL206	2018-Jul-18	1	32	.
8	UKVDL206	2018-Jul-18	2	32	.
8	UKVDL206	2018-Jul-18	3	32	.
8	UKVDL206	2018-Jul-18	4	32	1
8	UKVDL206	2018-Jul-18	5	32	1.5
8	UKVDL206	2018-Aug-01	6	32	2
8	UKVDL206	2018-Aug-01	7	32	2
8	UKVDL206	2018-Jul-18	1	36	.
8	UKVDL206	2018-Jul-18	2	36	.
8	UKVDL206	2018-Jul-18	3	36	.
8	UKVDL206	2018-Jul-18	4	36	2
8	UKVDL206	2018-Jul-18	5	36	2.5
8	UKVDL206	2018-Jul-19	1	40	2
8	UKVDL206	2018-Jul-19	2	40	3
8	UKVDL206	2018-Jul-19	3	40	2
8	UKVDL206	2018-Jul-19	4	40	.
8	UKVDL206	2018-Jul-19	5	40	.
8	UKVDL206	2018-Nov-29	8	40	3
8	UKVDL206	2018-Nov-29	9	40	2.5
8	UKVDL206	2018-Nov-29	10	40	3
8	UKVDL206	2018-Jul-19	1	44	2.5
8	UKVDL206	2018-Jul-19	2	44	3
8	UKVDL206	2018-Jul-19	3	44	2
8	UKVDL206	2018-Jul-19	4	44	.
8	UKVDL206	2018-Jul-19	5	44	.
8	UKVDL206	2018-Nov-29	8	44	3.5
8	UKVDL206	2018-Nov-29	9	44	2.5
8	UKVDL206	2018-Nov-29	10	44	3
8	UKVDL206	2018-Jul-19	1	48	2.5
8	UKVDL206	2018-Jul-19	2	48	3
8	UKVDL206	2018-Jul-19	3	48	2
8	UKVDL206	2018-Jul-19	4	48	.
8	UKVDL206	2018-Jul-19	5	48	.
8	UKVDL206	2018-Aug-02	6	48	4
8	UKVDL206	2018-Aug-02	7	48	3
8	UKVDL206	2018-Nov-29	8	48	4
8	UKVDL206	2018-Nov-29	9	48	3.5
8	UKVDL206	2018-Nov-29	10	48	3.5
9	33701	2018-Jul-17	1	20	0
9	33701	2018-Jul-17	2	20	0
9	33701	2018-Jul-17	3	20	0
9	33701	2018-Jul-17	4	20	0
9	33701	2018-Jul-17	5	20	.
9	33701	2018-Jul-17	1	24	0
9	33701	2018-Jul-17	2	24	0
9	33701	2018-Jul-17	3	24	0
9	33701	2018-Jul-17	4	24	0
9	33701	2018-Jul-17	5	24	0.5
9	33701	2018-Nov-28	8	24	0.5
9	33701	2018-Nov-28	9	24	0.5
9	33701	2018-Nov-28	10	24	0.3
9	33701	2018-Jul-18	1	28	.
9	33701	2018-Jul-18	2	28	.
9	33701	2018-Jul-18	3	28	.
9	33701	2018-Jul-18	4	28	.
9	33701	2018-Jul-18	5	28	1
9	33701	2018-Jul-18	1	32	.
9	33701	2018-Jul-18	2	32	.
9	33701	2018-Jul-18	3	32	.
9	33701	2018-Jul-18	4	32	.
9	33701	2018-Jul-18	5	32	2
9	33701	2018-Aug-01	6	32	1
9	33701	2018-Aug-01	7	32	1.5
9	33701	2018-Jul-18	1	36	.
9	33701	2018-Jul-18	2	36	.
9	33701	2018-Jul-18	3	36	.
9	33701	2018-Jul-18	4	36	.
9	33701	2018-Jul-18	5	36	3
9	33701	2018-Jul-19	1	40	4
9	33701	2018-Jul-19	2	40	3
9	33701	2018-Jul-19	3	40	3
9	33701	2018-Jul-19	4	40	5
9	33701	2018-Jul-19	5	40	.
9	33701	2018-Nov-29	8	40	3
9	33701	2018-Nov-29	9	40	3
9	33701	2018-Nov-29	10	40	2.5
9	33701	2018-Jul-19	1	44	5
9	33701	2018-Jul-19	2	44	4
9	33701	2018-Jul-19	3	44	6
9	33701	2018-Jul-19	4	44	6
9	33701	2018-Jul-19	5	44	.
9	33701	2018-Nov-29	8	44	4
9	33701	2018-Nov-29	9	44	4
9	33701	2018-Nov-29	10	44	3
9	33701	2018-Jul-19	1	48	.
9	33701	2018-Jul-19	2	48	4
9	33701	2018-Jul-19	3	48	7
9	33701	2018-Jul-19	4	48	6
9	33701	2018-Jul-19	5	48	.
9	33701	2018-Aug-02	6	48	6
9	33701	2018-Aug-02	7	48	7
9	33701	2018-Nov-29	8	48	4
9	33701	2018-Nov-29	9	48	4.5
9	33701	2018-Nov-29	10	48	4.5
10	33701 pc	2018-Jul-17	1	20	0
10	33701 pc	2018-Jul-17	2	20	0
10	33701 pc	2018-Jul-17	3	20	.
10	33701 pc	2018-Jul-17	4	20	.
10	33701 pc	2018-Jul-17	1	24	0
10	33701 pc	2018-Jul-17	2	24	0
10	33701 pc	2018-Jul-17	3	24	0.5
10	33701 pc	2018-Jul-17	4	24	0.5
10	33701 pc	2018-Nov-28	8	24	0.3
10	33701 pc	2018-Nov-28	9	24	0.4
10	33701 pc	2018-Nov-28	10	24	0.5
10	33701 pc	2018-Jul-18	1	28	.
10	33701 pc	2018-Jul-18	2	28	.
10	33701 pc	2018-Jul-18	3	28	1
10	33701 pc	2018-Jul-18	4	28	1
10	33701 pc	2018-Jul-18	1	32	.
10	33701 pc	2018-Jul-18	2	32	.
10	33701 pc	2018-Jul-18	3	32	2
10	33701 pc	2018-Jul-18	4	32	2.5
10	33701 pc	2018-Aug-01	5	32	1.5
10	33701 pc	2018-Aug-01	6	32	2
10	33701 pc	2018-Aug-01	7	32	2
10	33701 pc	2018-Jul-18	1	36	.
10	33701 pc	2018-Jul-18	2	36	.
10	33701 pc	2018-Jul-18	3	36	3
10	33701 pc	2018-Jul-18	4	36	4.5
10	33701 pc	2018-Jul-19	1	40	5
10	33701 pc	2018-Jul-19	2	40	4.5
10	33701 pc	2018-Jul-19	3	40	.
10	33701 pc	2018-Jul-19	4	40	.
10	33701 pc	2018-Nov-29	8	40	3
10	33701 pc	2018-Nov-29	9	40	3
10	33701 pc	2018-Nov-29	10	40	3.5
10	33701 pc	2018-Jul-19	1	44	6.5
10	33701 pc	2018-Jul-19	2	44	5
10	33701 pc	2018-Jul-19	3	44	.
10	33701 pc	2018-Jul-19	4	44	.
10	33701 pc	2018-Nov-29	8	44	4
10	33701 pc	2018-Nov-29	9	44	4
10	33701 pc	2018-Nov-29	10	44	4.5
10	33701 pc	2018-Jul-19	1	48	.
10	33701 pc	2018-Jul-19	2	48	6
10	33701 pc	2018-Jul-19	3	48	.
10	33701 pc	2018-Jul-19	4	48	.
10	33701 pc	2018-Aug-02	5	48	5
10	33701 pc	2018-Aug-02	6	48	6
10	33701 pc	2018-Aug-02	7	48	.
10	33701 pc	2018-Nov-29	8	48	4.5
10	33701 pc	2018-Nov-29	9	48	4.5
10	33701 pc	2018-Nov-29	10	48	4.5
11	WSU006	2018-Jul-17	1	20	0
11	WSU006	2018-Jul-17	2	20	0
11	WSU006	2018-Jul-17	3	20	.
11	WSU006	2018-Jul-17	4	20	.
11	WSU006	2018-Jul-17	5	20	.
11	WSU006	2018-Jul-17	1	24	0
11	WSU006	2018-Jul-17	2	24	0
11	WSU006	2018-Jul-17	3	24	1.5
11	WSU006	2018-Jul-17	4	24	2
11	WSU006	2018-Jul-17	5	24	1
11	WSU006	2018-Nov-28	6	24	0.5
11	WSU006	2018-Nov-28	7	24	0.2
11	WSU006	2018-Nov-28	8	24	0.6
11	WSU006	2018-Jul-18	1	28	.
11	WSU006	2018-Jul-18	2	28	.
11	WSU006	2018-Jul-18	3	28	2.5
11	WSU006	2018-Jul-18	4	28	3
11	WSU006	2018-Jul-18	5	28	2
11	WSU006	2018-Jul-18	1	32	.
11	WSU006	2018-Jul-18	2	32	.
11	WSU006	2018-Jul-18	3	32	3
11	WSU006	2018-Jul-18	4	32	3.5
11	WSU006	2018-Jul-18	5	32	2.5
11	WSU006	2018-Jul-18	1	36	.
11	WSU006	2018-Jul-18	2	36	.
11	WSU006	2018-Jul-18	3	36	4
11	WSU006	2018-Jul-18	4	36	4
11	WSU006	2018-Jul-18	5	36	3
11	WSU006	2018-Jul-19	1	40	3
11	WSU006	2018-Jul-19	2	40	4
11	WSU006	2018-Jul-19	3	40	.
11	WSU006	2018-Jul-19	4	40	.
11	WSU006	2018-Jul-19	5	40	.
11	WSU006	2018-Nov-29	6	40	2
11	WSU006	2018-Nov-29	7	40	1.5
11	WSU006	2018-Nov-29	8	40	2
11	WSU006	2018-Jul-19	1	44	3.5
11	WSU006	2018-Jul-19	2	44	4.5
11	WSU006	2018-Jul-19	3	44	.
11	WSU006	2018-Jul-19	4	44	.
11	WSU006	2018-Jul-19	5	44	.
11	WSU006	2018-Nov-29	6	44	2.5
11	WSU006	2018-Nov-29	7	44	2.5
11	WSU006	2018-Nov-29	8	44	2.5
11	WSU006	2018-Jul-19	1	48	3.5
11	WSU006	2018-Jul-19	2	48	4.5
11	WSU006	2018-Jul-19	3	48	.
11	WSU006	2018-Jul-19	4	48	.
11	WSU006	2018-Jul-19	5	48	.
11	WSU006	2018-Nov-29	6	48	3.5
11	WSU006	2018-Nov-29	7	48	2.5
11	WSU006	2018-Nov-29	8	48	2.5
12	103S-GFP	2018-Jul-17	1	20	0
12	103S-GFP	2018-Jul-17	2	20	0
12	103S-GFP	2018-Jul-17	3	20	.
12	103S-GFP	2018-Jul-17	4	20	.
12	103S-GFP	2018-Jul-17	5	20	.
12	103S-GFP	2018-Jul-17	1	24	0
12	103S-GFP	2018-Jul-17	2	24	0
12	103S-GFP	2018-Jul-17	3	24	0
12	103S-GFP	2018-Jul-17	4	24	0
12	103S-GFP	2018-Jul-17	5	24	0
12	103S-GFP	2018-Nov-28	9	24	0
12	103S-GFP	2018-Nov-28	10	24	0
12	103S-GFP	2018-Nov-28	11	24	0
12	103S-GFP	2018-Jul-18	1	28	.
12	103S-GFP	2018-Jul-18	2	28	.
12	103S-GFP	2018-Jul-18	3	28	0
12	103S-GFP	2018-Jul-18	4	28	0
12	103S-GFP	2018-Jul-18	5	28	0
12	103S-GFP	2018-Jul-18	1	32	.
12	103S-GFP	2018-Jul-18	2	32	.
12	103S-GFP	2018-Jul-18	3	32	0.5
12	103S-GFP	2018-Jul-18	4	32	0.5
12	103S-GFP	2018-Jul-18	5	32	0.5
12	103S-GFP	2018-Aug-01	6	32	0
12	103S-GFP	2018-Aug-01	7	32	0
12	103S-GFP	2018-Aug-01	8	32	0
12	103S-GFP	2018-Jul-18	1	36	.
12	103S-GFP	2018-Jul-18	2	36	.
12	103S-GFP	2018-Jul-18	3	36	1
12	103S-GFP	2018-Jul-18	4	36	0.75
12	103S-GFP	2018-Jul-18	5	36	1
12	103S-GFP	2018-Jul-19	1	40	2
12	103S-GFP	2018-Jul-19	2	40	3
12	103S-GFP	2018-Jul-19	3	40	.
12	103S-GFP	2018-Jul-19	4	40	.
12	103S-GFP	2018-Jul-19	5	40	.
12	103S-GFP	2018-Nov-29	9	40	1
12	103S-GFP	2018-Nov-29	10	40	1
12	103S-GFP	2018-Nov-29	11	40	0.5
12	103S-GFP	2018-Jul-19	1	44	2
12	103S-GFP	2018-Jul-19	2	44	3
12	103S-GFP	2018-Jul-19	3	44	.
12	103S-GFP	2018-Jul-19	4	44	.
12	103S-GFP	2018-Jul-19	5	44	.
12	103S-GFP	2018-Nov-29	9	44	2
12	103S-GFP	2018-Nov-29	10	44	1.5
12	103S-GFP	2018-Nov-29	11	44	1
12	103S-GFP	2018-Jul-19	1	48	2.5
12	103S-GFP	2018-Jul-19	2	48	3
12	103S-GFP	2018-Jul-19	3	48	.
12	103S-GFP	2018-Jul-19	4	48	.
12	103S-GFP	2018-Jul-19	5	48	.
12	103S-GFP	2018-Aug-02	6	48	2
12	103S-GFP	2018-Aug-02	7	48	2
12	103S-GFP	2018-Aug-02	8	48	1.5
12	103S-GFP	2018-Nov-29	9	48	2
12	103S-GFP	2018-Nov-29	10	48	1.5
12	103S-GFP	2018-Nov-29	11	48	1

## Sheet: Biofilm data
Biological replicate	Time point	Plate	Well ID	Name	Well	A595:595	Blank A595:595	Mean	Mean BHI BLANKED	AVG input CFU	CFU/mL 1	CFU/mL 2	log10 AVG input CFU	A595/input CFU	A595/log10 input CFU
1	24	1	SPL1	103+	A1	0.365	0.321	0.342	0.3218	41500	430000	400000	4.61805	7.75422e-06	0.0696831
1	24	1	SPL1	103+	B1	0.452	0.408			41500	430000	400000	4.61805
1	24	1	SPL1	103+	C1	0.39	0.345			41500	430000	400000	4.61805
1	24	1	SPL1	103+	D1	0.337	0.293			41500	430000	400000	4.61805
3	24	7	SPL1	103+	A1	0.977	.	0.107667	0.0874667	82500	750000	900000	4.91645	1.0602e-06	0.0177906
3	24	7	SPL1	103+	B1	0.229	0.186			82500	750000	900000	4.91645
3	24	7	SPL1	103+	C1	0.126	0.083			82500	750000	900000	4.91645
3	24	7	SPL1	103+	D1	0.097	0.054			82500	750000	900000	4.91645
4	24	1	SPL1	103+	A1	0.501	0.457	0.359	0.3388	250000		2500000	5.39794	1.3552e-06	0.0627647
4	24	1	SPL1	103+	B1	0.313	0.27			250000		2500000	5.39794
4	24	1	SPL1	103+	C1	0.4	0.356			250000		2500000	5.39794
4	24	1	SPL1	103+	D1	0.397	0.354			250000		2500000	5.39794
1	48	2	SPL1	103+	A1	0.604	0.559	0.521	0.5008	41500	430000	400000	4.61805	1.20675e-05	0.108444
1	48	2	SPL1	103+	B1	0.656	0.612			41500	430000	400000	4.61805
1	48	2	SPL1	103+	C1	0.568	0.524			41500	430000	400000	4.61805
1	48	2	SPL1	103+	D1	0.434	0.389			41500	430000	400000	4.61805
2	48	5	SPL1	103+	A1	1.137	1.093	1.102	1.0818	79500	690000	900000	4.90037	1.36075e-05	0.220759
2	48	5	SPL1	103+	B1	1.317	1.272			79500	690000	900000	4.90037
2	48	5	SPL1	103+	C1	1.079	1.034			79500	690000	900000	4.90037
2	48	5	SPL1	103+	D1	1.052	1.008			79500	690000	900000	4.90037
3	48	8	SPL1	103+	A1	0.646	0.603	0.603	0.5828	82500	750000	900000	4.91645	7.06424e-06	0.118541
3	48	8	SPL1	103+	B1	0.594	0.55			82500	750000	900000	4.91645
3	48	8	SPL1	103+	C1	0.823	0.779			82500	750000	900000	4.91645
3	48	8	SPL1	103+	D1	0.525	0.481			82500	750000	900000	4.91645
4	48	2	SPL1	103+	A1	0.373	0.327	0.309	0.2888	250000		2500000	5.39794	1.1552e-06	0.0535019
4	48	2	SPL1	103+	B1	0.329	0.283			250000		2500000	5.39794
4	48	2	SPL1	103+	C1	0.359	0.314			250000		2500000	5.39794
4	48	2	SPL1	103+	D1	0.36	0.314			250000		2500000	5.39794
1	72	3	SPL1	103+	A1	1.344	1.301	0.838	0.8178	41500	430000	400000	4.61805	1.9706e-05	0.177088
1	72	3	SPL1	103+	B1	1.013	0.971			41500	430000	400000	4.61805
1	72	3	SPL1	103+	C1	0.628	0.585			41500	430000	400000	4.61805
1	72	3	SPL1	103+	D1	0.537	0.494			41500	430000	400000	4.61805
2	72	6	SPL1	103+	A1	0.668	0.625	0.737	0.7168	79500	690000	900000	4.90037	9.01635e-06	0.146275
2	72	6	SPL1	103+	B1	1	0.956			79500	690000	900000	4.90037
2	72	6	SPL1	103+	C1	0.883	0.84			79500	690000	900000	4.90037
2	72	6	SPL1	103+	D1	0.569	0.526			79500	690000	900000	4.90037
3	72	9	SPL1	103+	A1	0.515	0.472	0.501	0.4808	82500	750000	900000	4.91645	5.82788e-06	0.0977941
3	72	9	SPL1	103+	B1	0.618	0.575			82500	750000	900000	4.91645
3	72	9	SPL1	103+	C1	0.523	0.48			82500	750000	900000	4.91645
3	72	9	SPL1	103+	D1	0.52	0.477			82500	750000	900000	4.91645
4	72	3	SPL1	103+	A1	0.268	0.222	0.304	0.2838	250000		2500000	5.39794	1.1352e-06	0.0525756
4	72	3	SPL1	103+	B1	0.354	0.308			250000		2500000	5.39794
4	72	3	SPL1	103+	C1	0.398	0.351			250000		2500000	5.39794
4	72	3	SPL1	103+	D1	0.383	0.336			250000		2500000	5.39794
1	24	1	SPL2	103S-GFP	A2	0.51	0.466	0.379	0.3588	4000	40000		3.60206	8.97e-05	0.0996097
1	24	1	SPL2	103S-GFP	B2	0.496	0.451			4000	40000		3.60206
1	24	1	SPL2	103S-GFP	C2	0.356	0.312			4000	40000		3.60206
1	24	1	SPL2	103S-GFP	D2	0.331	0.287			4000	40000		3.60206
2	24	4	SPL2	103S-GFP	A2	0.211	0.167	0.309	0.2888	19000	180000	200000	4.27875	1.52e-05	0.0674963
2	24	4	SPL2	103S-GFP	B2	0.317	0.272			19000	180000	200000	4.27875
2	24	4	SPL2	103S-GFP	C2	0.419	0.375			19000	180000	200000	4.27875
2	24	4	SPL2	103S-GFP	D2	0.468	0.423			19000	180000	200000	4.27875
3	24	7	SPL2	103S-GFP	A2	0.323	0.28	0.268	0.2478	36500	330000	400000	4.56229	6.78904e-06	0.0543148
3	24	7	SPL2	103S-GFP	B2	0.216	0.172			36500	330000	400000	4.56229
3	24	7	SPL2	103S-GFP	C2	0.266	0.223			36500	330000	400000	4.56229
3	24	7	SPL2	103S-GFP	D2	0.442	0.399			36500	330000	400000	4.56229
4	24	1	SPL2	103S-GFP	A2	0.415	0.372	0.403	0.3828	5000	50000		3.69897	7.656e-05	0.103488
4	24	1	SPL2	103S-GFP	B2	0.631	0.588			5000	50000		3.69897
4	24	1	SPL2	103S-GFP	C2	0.34	0.296			5000	50000		3.69897
4	24	1	SPL2	103S-GFP	D2	0.401	0.357			5000	50000		3.69897
1	48	2	SPL2	103S-GFP	A2	0.593	0.549	0.47	0.4498	4000	40000		3.60206	0.00011245	0.124873
1	48	2	SPL2	103S-GFP	B2	0.702	0.657			4000	40000		3.60206
1	48	2	SPL2	103S-GFP	C2	0.332	0.287			4000	40000		3.60206
1	48	2	SPL2	103S-GFP	D2	0.429	0.385			4000	40000		3.60206
2	48	5	SPL2	103S-GFP	A2	0.599	0.555	0.504	0.4838	19000	180000	200000	4.27875	2.54632e-05	0.11307
2	48	5	SPL2	103S-GFP	B2	0.523	0.478			19000	180000	200000	4.27875
2	48	5	SPL2	103S-GFP	C2	0.468	0.424			19000	180000	200000	4.27875
2	48	5	SPL2	103S-GFP	D2	0.602	0.557			19000	180000	200000	4.27875
3	48	8	SPL2	103S-GFP	A2	1.113	1.069	0.935	0.9148	36500	330000	400000	4.56229	2.5063e-05	0.200513
3	48	8	SPL2	103S-GFP	B2	0.867	0.823			36500	330000	400000	4.56229
3	48	8	SPL2	103S-GFP	C2	1.371	1.327			36500	330000	400000	4.56229
3	48	8	SPL2	103S-GFP	D2	0.566	0.522			36500	330000	400000	4.56229
4	48	2	SPL2	103S-GFP	A2	0.3	0.254	0.199	0.1788	5000	50000		3.69897	3.576e-05	0.0483378
4	48	2	SPL2	103S-GFP	B2	0.121	0.075			5000	50000		3.69897
4	48	2	SPL2	103S-GFP	C2	0.294	0.248			5000	50000		3.69897
4	48	2	SPL2	103S-GFP	D2	0.264	0.218			5000	50000		3.69897
1	72	3	SPL2	103S-GFP	A2	0.821	0.778	0.548	0.5278	4000	40000		3.60206	0.00013195	0.146527
1	72	3	SPL2	103S-GFP	B2	0.61	0.567			4000	40000		3.60206
1	72	3	SPL2	103S-GFP	C2	0.393	0.35			4000	40000		3.60206
1	72	3	SPL2	103S-GFP	D2	0.538	0.496			4000	40000		3.60206
2	72	6	SPL2	103S-GFP	A2	0.363	0.319	0.368	0.3478	19000	180000	200000	4.27875	1.83053e-05	0.0812854
2	72	6	SPL2	103S-GFP	B2	0.651	0.608			19000	180000	200000	4.27875
2	72	6	SPL2	103S-GFP	C2	0.283	0.239			19000	180000	200000	4.27875
2	72	6	SPL2	103S-GFP	D2	0.35	0.307			19000	180000	200000	4.27875
3	72	9	SPL2	103S-GFP	A2	1.297	1.255	0.883	0.8628	36500	330000	400000	4.56229	2.36384e-05	0.189115
3	72	9	SPL2	103S-GFP	B2	0.56	0.517			36500	330000	400000	4.56229
3	72	9	SPL2	103S-GFP	C2	1.013	0.971			36500	330000	400000	4.56229
3	72	9	SPL2	103S-GFP	D2	0.833	0.79			36500	330000	400000	4.56229
4	72	3	SPL2	103S-GFP	A2	0.289	0.243	0.277	0.2568	5000	50000		3.69897	5.136e-05	0.0694247
4	72	3	SPL2	103S-GFP	B2	0.352	0.306			5000	50000		3.69897
4	72	3	SPL2	103S-GFP	C2	0.321	0.275			5000	50000		3.69897
4	72	3	SPL2	103S-GFP	D2	0.332	0.285			5000	50000		3.69897
1	24	1	SPL3	33701	A3	0.342	0.298	0.351	0.3308	17500	150000	200000	4.24304	1.89029e-05	0.077963
1	24	1	SPL3	33701	B3	0.386	0.342			17500	150000	200000	4.24304
1	24	1	SPL3	33701	C3	0.499	0.455			17500	150000	200000	4.24304
1	24	1	SPL3	33701	D3	0.353	0.308			17500	150000	200000	4.24304
2	24	4	SPL3	33701	A3	0.369	0.324	0.271	0.2508	51500	430000	600000	4.71181	4.8699e-06	0.053228
2	24	4	SPL3	33701	B3	0.396	0.351			51500	430000	600000	4.71181
2	24	4	SPL3	33701	C3	0.276	0.231			51500	430000	600000	4.71181
2	24	4	SPL3	33701	D3	0.22	0.175			51500	430000	600000	4.71181
3	24	7	SPL3	33701	A3	0.127	0.084	0.091	0.0708	37000	440000	300000	4.5682	1.91351e-06	0.0154984
3	24	7	SPL3	33701	B3	0.124	0.081			37000	440000	300000	4.5682
3	24	7	SPL3	33701	C3	0.196	0.153			37000	440000	300000	4.5682
3	24	7	SPL3	33701	D3	0.088	0.045			37000	440000	300000	4.5682
4	24	1	SPL3	33701	A3	0.259	0.215	0.35	0.3298	23500	70000	400000	4.37107	1.4034e-05	0.0754507
4	24	1	SPL3	33701	B3	0.403	0.36			23500	70000	400000	4.37107
4	24	1	SPL3	33701	C3	0.461	0.417			23500	70000	400000	4.37107
4	24	1	SPL3	33701	D3	0.45	0.407			23500	70000	400000	4.37107
1	48	2	SPL3	33701	A3	0.514	0.47	0.446	0.4258	17500	150000	200000	4.24304	2.43314e-05	0.100353
1	48	2	SPL3	33701	B3	0.449	0.404			17500	150000	200000	4.24304
1	48	2	SPL3	33701	C3	0.553	0.508			17500	150000	200000	4.24304
1	48	2	SPL3	33701	D3	0.446	0.401			17500	150000	200000	4.24304
2	48	5	SPL3	33701	A3	0.504	0.459	0.408	0.3878	51500	430000	600000	4.71181	7.5301e-06	0.0823039
2	48	5	SPL3	33701	B3	0.474	0.43			51500	430000	600000	4.71181
2	48	5	SPL3	33701	C3	0.436	0.392			51500	430000	600000	4.71181
2	48	5	SPL3	33701	D3	0.395	0.351			51500	430000	600000	4.71181
3	48	8	SPL3	33701	A3	0.472	0.428	0.358667	0.338467	37000	440000	300000	4.5682	9.14775e-06	0.0740919
3	48	8	SPL3	33701	B3	0.397	0.353			37000	440000	300000	4.5682
3	48	8	SPL3	33701	C3	0.338	0.295			37000	440000	300000	4.5682
3	48	8	SPL3	33701	D3	1.152	1.108OMIT			37000	440000	300000	4.5682
4	48	2	SPL3	33701	A3	0.088	0.042	0.057	0.0368	23500	70000	400000	4.37107	1.56596e-06	0.008419
4	48	2	SPL3	33701	B3	0.066	0.02			23500	70000	400000	4.37107
4	48	2	SPL3	33701	C3	0.121	0.075			23500	70000	400000	4.37107
4	48	2	SPL3	33701	D3	0.138	0.092			23500	70000	400000	4.37107
1	72	3	SPL3	33701	A3	0.768	0.725	0.544	0.5238	17500	150000	200000	4.24304	2.99314e-05	0.123449
1	72	3	SPL3	33701	B3	0.672	0.629			17500	150000	200000	4.24304
1	72	3	SPL3	33701	C3	0.613	0.57			17500	150000	200000	4.24304
1	72	3	SPL3	33701	D3	0.296	0.253			17500	150000	200000	4.24304
2	72	6	SPL3	33701	A3	0.372	0.329	0.291	0.2708	51500	430000	600000	4.71181	5.25825e-06	0.0574726
2	72	6	SPL3	33701	B3	0.424	0.381			51500	430000	600000	4.71181
2	72	6	SPL3	33701	C3	0.282	0.239			51500	430000	600000	4.71181
2	72	6	SPL3	33701	D3	0.258	0.215			51500	430000	600000	4.71181
3	72	9	SPL3	33701	A3	0.603	0.561	0.467	0.4468	37000	440000	300000	4.5682	1.20757e-05	0.0978065
3	72	9	SPL3	33701	B3	0.583	0.54			37000	440000	300000	4.5682
3	72	9	SPL3	33701	C3	0.421	0.379			37000	440000	300000	4.5682
3	72	9	SPL3	33701	D3	0.429	0.386			37000	440000	300000	4.5682
4	72	3	SPL3	33701	A3	0.377	0.33	0.392	0.3718	23500	70000	400000	4.37107	1.58213e-05	0.0850593
4	72	3	SPL3	33701	B3	0.381	0.334			23500	70000	400000	4.37107
4	72	3	SPL3	33701	C3	0.439	0.392			23500	70000	400000	4.37107
4	72	3	SPL3	33701	D3	0.558	0.511			23500	70000	400000	4.37107
1	24	1	SPL4	33701 pc	A4	0.37	0.325	0.348	0.3278	14500	190000	100000	4.16137	2.26069e-05	0.0787722
1	24	1	SPL4	33701 pc	B4	0.42	0.375			14500	190000	100000	4.16137
1	24	1	SPL4	33701 pc	C4	0.46	0.416			14500	190000	100000	4.16137
1	24	1	SPL4	33701 pc	D4	0.32	0.276			14500	190000	100000	4.16137
2	24	4	SPL4	33701 pc	A4	0.397	0.353	0.271	0.2508	35000	500000	200000	4.54407	7.16571e-06	0.0551928
2	24	4	SPL4	33701 pc	B4	0.36	0.316			35000	500000	200000	4.54407
2	24	4	SPL4	33701 pc	C4	0.185	0.14			35000	500000	200000	4.54407
2	24	4	SPL4	33701 pc	D4	0.318	0.274			35000	500000	200000	4.54407
3	24	7	SPL4	33701 pc	A4	0.182	0.139	0.105	0.0848	940000		9400000	5.97313	9.02128e-08	0.0141969
3	24	7	SPL4	33701 pc	B4	0.187	0.144			940000		9400000	5.97313
3	24	7	SPL4	33701 pc	C4	0.098	0.055			940000		9400000	5.97313
3	24	7	SPL4	33701 pc	D4	0.124	0.081			940000		9400000	5.97313
4	24	1	SPL4	33701 pc	A4	0.308	0.264	0.318	0.2978	19000	180000	200000	4.27875	1.56737e-05	0.0695997
4	24	1	SPL4	33701 pc	B4	0.465	0.422			19000	180000	200000	4.27875
4	24	1	SPL4	33701 pc	C4	0.342	0.298			19000	180000	200000	4.27875
4	24	1	SPL4	33701 pc	D4	0.332	0.288			19000	180000	200000	4.27875
1	48	2	SPL4	33701 pc	A4	0.465	0.42	0.368	0.3478	14500	190000	100000	4.16137	2.39862e-05	0.0835783
1	48	2	SPL4	33701 pc	B4	0.5	0.455			14500	190000	100000	4.16137
1	48	2	SPL4	33701 pc	C4	0.353	0.309			14500	190000	100000	4.16137
1	48	2	SPL4	33701 pc	D4	0.334	0.289			14500	190000	100000	4.16137
2	48	5	SPL4	33701 pc	A4	0.52	0.476	0.439	0.4188	35000	500000	200000	4.54407	1.19657e-05	0.0921641
2	48	5	SPL4	33701 pc	B4	0.451	0.407			35000	500000	200000	4.54407
2	48	5	SPL4	33701 pc	C4	0.546	0.502			35000	500000	200000	4.54407
2	48	5	SPL4	33701 pc	D4	0.414	0.37			35000	500000	200000	4.54407
3	48	8	SPL4	33701 pc	A4	0.863	0.819	0.856	0.8358	940000		9400000	5.97313	8.89149e-07	0.139927
3	48	8	SPL4	33701 pc	B4	0.474	0.431			940000		9400000	5.97313
3	48	8	SPL4	33701 pc	C4	1.324	1.28			940000		9400000	5.97313
3	48	8	SPL4	33701 pc	D4	0.938	0.894			940000		9400000	5.97313
4	48	2	SPL4	33701 pc	A4	0.062	0.016	0.052	0.0318	19000	180000	200000	4.27875	1.67368e-06	0.00743207
4	48	2	SPL4	33701 pc	B4	0.08	0.034			19000	180000	200000	4.27875
4	48	2	SPL4	33701 pc	C4	0.144	0.098			19000	180000	200000	4.27875
4	48	2	SPL4	33701 pc	D4	0.105	0.059			19000	180000	200000	4.27875
1	72	3	SPL4	33701 pc	A4	0.646	0.603	0.488	0.4678	14500	190000	100000	4.16137	3.22621e-05	0.112415
1	72	3	SPL4	33701 pc	B4	0.596	0.553			14500	190000	100000	4.16137
1	72	3	SPL4	33701 pc	C4	0.451	0.409			14500	190000	100000	4.16137
1	72	3	SPL4	33701 pc	D4	0.431	0.388			14500	190000	100000	4.16137
2	72	6	SPL4	33701 pc	A4	0.317	0.273	0.281	0.2608	35000	500000	200000	4.54407	7.45143e-06	0.0573935
2	72	6	SPL4	33701 pc	B4	0.333	0.289			35000	500000	200000	4.54407
2	72	6	SPL4	33701 pc	C4	0.281	0.238			35000	500000	200000	4.54407
2	72	6	SPL4	33701 pc	D4	0.368	0.325			35000	500000	200000	4.54407
3	72	9	SPL4	33701 pc	A4	0.42	0.378	0.433	0.4128	940000		9400000	5.97313	4.39149e-07	0.0691095
3	72	9	SPL4	33701 pc	B4	0.57	0.527			940000		9400000	5.97313
3	72	9	SPL4	33701 pc	C4	0.49	0.448			940000		9400000	5.97313
3	72	9	SPL4	33701 pc	D4	0.42	0.378			940000		9400000	5.97313
4	72	3	SPL4	33701 pc	A4	0.294	0.247	0.361	0.3408	19000	180000	200000	4.27875	1.79368e-05	0.0796494
4	72	3	SPL4	33701 pc	B4	0.419	0.373			19000	180000	200000	4.27875
4	72	3	SPL4	33701 pc	C4	0.455	0.409			19000	180000	200000	4.27875
4	72	3	SPL4	33701 pc	D4	0.463	0.417			19000	180000	200000	4.27875
1	24	1	SPL15	BHI blank	E3	0.45	0.406	0.416OMIT
1	24	1	SPL15	BHI blank	F3	0.563	0.518
1	24	1	SPL15	BHI blank	G3	0.418	0.373
1	24	1	SPL15	BHI blank	H3	0.413	0.368
2	24	4	SPL15	BHI blank	E3	0.255	0.211	0.131
2	24	4	SPL15	BHI blank	F3	0.282	0.238
2	24	4	SPL15	BHI blank	G3	0.098	0.053
2	24	4	SPL15	BHI blank	H3	0.068	0.023
3	24	7	SPL15	BHI blank	E3	0.671	0.628	0.172OMIT
3	24	7	SPL15	BHI blank	F3	0.063	0.02	0.02
3	24	7	SPL15	BHI blank	G3	0.07	0.027
3	24	7	SPL15	BHI blank	H3	0.056	0.013
4	24	1	SPL15	BHI blank	E3	0.054	0.01	0.018
4	24	1	SPL15	BHI blank	F3	0.057	0.013
4	24	1	SPL15	BHI blank	G3	0.073	0.029
4	24	1	SPL15	BHI blank	H3	0.065	0.021
5	24	1		BHI blank	E1	0.051	0.007	0.035
5	24	1		BHI blank	F1	0.05	0.007
5	24	1		BHI blank	G1	0.114	0.07
5	24	1		BHI blank	H1	0.1	0.057
6	24	1		BHI blank	E1	0.051	0.007	0.035
6	24	1		BHI blank	F1	0.05	0.007
6	24	1		BHI blank	G1	0.114	0.07
6	24	1		BHI blank	H1	0.1	0.057
1	48	2	SPL15	BHI blank	E3	1.325	1.28	0.983OMIT
1	48	2	SPL15	BHI blank	F3	0.785	0.741
1	48	2	SPL15	BHI blank	G3	0.654	0.61
1	48	2	SPL15	BHI blank	H3	1.346	1.301
2	48	5	SPL15	BHI blank	E3	0.397	0.352	0.168OMIT
2	48	5	SPL15	BHI blank	F3	0.282	0.237
2	48	5	SPL15	BHI blank	G3	0.068	0.024	0.041
2	48	5	SPL15	BHI blank	H3	0.102	0.058
3	48	8	SPL15	BHI blank	E3	0.842	0.798	0.256OMIT
3	48	8	SPL15	BHI blank	F3	0.222	0.178
3	48	8	SPL15	BHI blank	G3	0.065	0.021	0.0235
3	48	8	SPL15	BHI blank	H3	0.069	0.026
4	48	2	SPL15	BHI blank	E3	0.052	0.006	0.017
4	48	2	SPL15	BHI blank	F3	0.057	0.011
4	48	2	SPL15	BHI blank	G3	0.074	0.028
4	48	2	SPL15	BHI blank	H3	0.067	0.021
5	48	2	SPL15	BHI blank	E1	0.047	0.002	0.005
5	48	2	SPL15	BHI blank	F1	0.046	0
5	48	2	SPL15	BHI blank	G1	0.062	0.017
5	48	2	SPL15	BHI blank	H1	0.048	0.003
6	48	2		BHI blank	E1	0.047	0.002	0.005
6	48	2		BHI blank	F1	0.046	0
6	48	2		BHI blank	G1	0.062	0.017
6	48	2		BHI blank	H1	0.048	0.003
1	72	3	SPL15	BHI blank	E3	1.875	1.832	1.072OMIT
1	72	3	SPL15	BHI blank	F3	0.855	0.813
1	72	3	SPL15	BHI blank	G3	0.936	0.893
1	72	3	SPL15	BHI blank	H3	0.793	0.75
2	72	6	SPL15	BHI blank	E3	0.287	0.244	0.104OMIT
2	72	6	SPL15	BHI blank	F3	0.173	0.13
2	72	6	SPL15	BHI blank	G3	0.064	0.02	0.0205
2	72	6	SPL15	BHI blank	H3	0.064	0.021
3	72	9	SPL15	BHI blank	E3	0.227	0.184	0.168OMIT
3	72	9	SPL15	BHI blank	F3	0.327	0.284
3	72	9	SPL15	BHI blank	G3	OVRFLW	?????
3	72	9	SPL15	BHI blank	H3	0.078	0.035	0.035
4	72	3	SPL15	BHI blank	E3	0.049	0.002	0.018
4	72	3	SPL15	BHI blank	F3	0.053	0.007
4	72	3	SPL15	BHI blank	G3	0.075	0.029
4	72	3	SPL15	BHI blank	H3	0.081	0.034
5	72	3	SPL15	BHI blank	E1	0.047	0.004	0.017
5	72	3	SPL15	BHI blank	F1	0.054	0.01
5	72	3	SPL15	BHI blank	G1	0.073	0.03
5	72	3	SPL15	BHI blank	H1	0.069	0.026
6	72	3		BHI blank	E1	0.047	0.004	0.017
6	72	3		BHI blank	F1	0.054	0.01
6	72	3		BHI blank	G1	0.073	0.03
6	72	3		BHI blank	H1	0.069	0.026
1	24	1	BLK	Empty well stained	E4	0.044	-0.001	0
1	24	1	BLK	Empty well stained	F4	0.046	0.002
1	24	1	BLK	Empty well stained	G4	0.044	0
1	24	1	BLK	Empty well stained	H4	0.044	-0.001
2	24	4	BLK	Empty well stained	E4	0.043	-0.001	0
2	24	4	BLK	Empty well stained	F4	0.044	0
2	24	4	BLK	Empty well stained	G4	0.046	0.002
2	24	4	BLK	Empty well stained	H4	0.044	0
3	24	7	BLK	Empty well stained	E4	0.044	0	0
3	24	7	BLK	Empty well stained	F4	0.042	-0.001
3	24	7	BLK	Empty well stained	G4	0.044	0.001
3	24	7	BLK	Empty well stained	H4	0.043	0
4	24	1	BLK	Empty well stained	E4	0.044	0	0
4	24	1	BLK	Empty well stained	F4	0.043	-0.001
4	24	1	BLK	Empty well stained	G4	0.045	0.001
4	24	1	BLK	Empty well stained	H4	0.043	0
5	24	1	BLK	Empty well stained	E2	0.042	-0.001	0
5	24	1	BLK	Empty well stained	F2	0.045	0.001
5	24	1	BLK	Empty well stained	G2	0.043	-0.001
5	24	1	BLK	Empty well stained	H2	0.044	0
6	24	1	BLK	Empty well stained	E2	0.042	-0.001	0
6	24	1	BLK	Empty well stained	F2	0.045	0.001
6	24	1	BLK	Empty well stained	G2	0.043	-0.001
6	24	1	BLK	Empty well stained	H2	0.044	0
1	48	2	BLK	Empty well stained	E4	0.043	-0.001	0
1	48	2	BLK	Empty well stained	F4	0.045	0
1	48	2	BLK	Empty well stained	G4	0.047	0.003
1	48	2	BLK	Empty well stained	H4	0.043	-0.002
2	48	5	BLK	Empty well stained	E4	0.048	0.004	0
2	48	5	BLK	Empty well stained	F4	0.043	-0.002
2	48	5	BLK	Empty well stained	G4	0.044	-0.001
2	48	5	BLK	Empty well stained	H4	0.043	-0.002
3	48	8	BLK	Empty well stained	E4	0.044	0	0
3	48	8	BLK	Empty well stained	F4	0.042	-0.002
3	48	8	BLK	Empty well stained	G4	0.045	0.001
3	48	8	BLK	Empty well stained	H4	0.045	0.001
4	48	2	BLK	Empty well stained	E4	0.05	0.004	0
4	48	2	BLK	Empty well stained	F4	0.043	-0.003
4	48	2	BLK	Empty well stained	G4	0.045	-0.001
4	48	2	BLK	Empty well stained	H4	0.046	0
5	48	2	BLK	Empty well stained	E2	0.047	0.002	0
5	48	2	BLK	Empty well stained	F2	0.043	-0.002
5	48	2	BLK	Empty well stained	G2	0.049	0.004
5	48	2	BLK	Empty well stained	H2	0.042	-0.003
6	48	2	BLK	Empty well stained	E2	0.047	0.002	0
6	48	2	BLK	Empty well stained	F2	0.043	-0.002
6	48	2	BLK	Empty well stained	G2	0.049	0.004
6	48	2	BLK	Empty well stained	H2	0.042	-0.003
1	72	3	BLK	Empty well stained	E4	0.043	0	0
1	72	3	BLK	Empty well stained	F4	0.042	-0.001
1	72	3	BLK	Empty well stained	G4	0.043	0.001
1	72	3	BLK	Empty well stained	H4	0.043	0
2	72	6	BLK	Empty well stained	E4	0.043	0	0
2	72	6	BLK	Empty well stained	F4	0.042	-0.001
2	72	6	BLK	Empty well stained	G4	0.044	0.001
2	72	6	BLK	Empty well stained	H4	0.043	0
3	72	9	BLK	Empty well stained	E4	0.044	0.002	0
3	72	9	BLK	Empty well stained	F4	0.042	-0.001
3	72	9	BLK	Empty well stained	G4	0.042	-0.001
3	72	9	BLK	Empty well stained	H4	0.043	0
4	72	3	BLK	Empty well stained	E4	0.049	0.002	0
4	72	3	BLK	Empty well stained	F4	0.05	0.003
4	72	3	BLK	Empty well stained	G4	0.044	-0.003
4	72	3	BLK	Empty well stained	H4	0.044	-0.003
5	72	3	BLK	Empty well stained	E2	0.047	0.003	0
5	72	3	BLK	Empty well stained	F2	0.042	-0.002
5	72	3	BLK	Empty well stained	G2	0.043	0
5	72	3	BLK	Empty well stained	H2	0.042	-0.001
6	72	3	BLK	Empty well stained	E2	0.047	0.003	0
6	72	3	BLK	Empty well stained	F2	0.042	-0.002
6	72	3	BLK	Empty well stained	G2	0.043	0
6	72	3	BLK	Empty well stained	H2	0.042	-0.001
1	24	1	SPL5	UKVDL206	A5	0.417	0.373	0.378	0.3578	29500	390000	200000	4.46982	1.21288e-05	0.0800479
1	24	1	SPL5	UKVDL206	B5	0.385	0.34			29500	390000	200000	4.46982
1	24	1	SPL5	UKVDL206	C5	0.489	0.445			29500	390000	200000	4.46982
1	24	1	SPL5	UKVDL206	D5	0.4	0.356			29500	390000	200000	4.46982
2	24	4	SPL5	UKVDL206	A5	0.703	0.658	0.886	0.8658	73500	670000	800000	4.86629	1.17796e-05	0.177918
2	24	4	SPL5	UKVDL206	B5	1.221	1.176			73500	670000	800000	4.86629
2	24	4	SPL5	UKVDL206	C5	0.52	0.476			73500	670000	800000	4.86629
2	24	4	SPL5	UKVDL206	D5	1.28	1.235			73500	670000	800000	4.86629
3	24	7	SPL5	UKVDL206	A5	0.57	0.527	0.317667	0.297467	120500	710000	1.7e+06	5.08099	2.4686e-06	0.0585451
3	24	7	SPL5	UKVDL206	B5	1.343	1.299OMIT			120500	710000	1.7e+06	5.08099
3	24	7	SPL5	UKVDL206	C5	0.317	0.274			120500	710000	1.7e+06	5.08099
3	24	7	SPL5	UKVDL206	D5	0.195	0.152			120500	710000	1.7e+06	5.08099
4	24	1	SPL5	UKVDL206	A5	0.341	0.298	0.328	0.3078	12000	120000		4.07918	2.565e-05	0.0754563
4	24	1	SPL5	UKVDL206	B5	0.473	0.429			12000	120000		4.07918
4	24	1	SPL5	UKVDL206	C5	0.346	0.302			12000	120000		4.07918
4	24	1	SPL5	UKVDL206	D5	0.328	0.284			12000	120000		4.07918
1	48	2	SPL5	UKVDL206	A5	0.64	0.595	0.481	0.4608	29500	390000	200000	4.46982	1.56203e-05	0.103091
1	48	2	SPL5	UKVDL206	B5	0.573	0.528			29500	390000	200000	4.46982
1	48	2	SPL5	UKVDL206	C5	0.559	0.514			29500	390000	200000	4.46982
1	48	2	SPL5	UKVDL206	D5	0.332	0.287			29500	390000	200000	4.46982
2	48	5	SPL5	UKVDL206	A5	0.683	0.639	0.608	0.5878	73500	670000	800000	4.86629	7.99728e-06	0.12079
2	48	5	SPL5	UKVDL206	B5	0.918	0.873			73500	670000	800000	4.86629
2	48	5	SPL5	UKVDL206	C5	0.51	0.466			73500	670000	800000	4.86629
2	48	5	SPL5	UKVDL206	D5	0.5	0.455			73500	670000	800000	4.86629
3	48	8	SPL5	UKVDL206	A5	1.788	1.744	1.006	0.9858	120500	710000	1.7e+06	5.08099	8.18091e-06	0.194017
3	48	8	SPL5	UKVDL206	B5	0.878	0.834			120500	710000	1.7e+06	5.08099
3	48	8	SPL5	UKVDL206	C5	0.859	0.815			120500	710000	1.7e+06	5.08099
3	48	8	SPL5	UKVDL206	D5	0.675	0.632			120500	710000	1.7e+06	5.08099
4	48	2	SPL5	UKVDL206	A5	0.085	0.039	0.08	0.0598	12000	120000		4.07918	4.98333e-06	0.0146598
4	48	2	SPL5	UKVDL206	B5	0.1	0.054			12000	120000		4.07918
4	48	2	SPL5	UKVDL206	C5	0.13	0.084			12000	120000		4.07918
4	48	2	SPL5	UKVDL206	D5	0.191	0.145			12000	120000		4.07918
1	72	3	SPL5	UKVDL206	A5	2.272	2.229OMIT	0.894667	0.874467	29500	390000	200000	4.46982	2.96429e-05	0.195638
1	72	3	SPL5	UKVDL206	B5	1.246	1.203			29500	390000	200000	4.46982
1	72	3	SPL5	UKVDL206	C5	0.782	0.74			29500	390000	200000	4.46982
1	72	3	SPL5	UKVDL206	D5	0.784	0.741			29500	390000	200000	4.46982
2	72	6	SPL5	UKVDL206	A5	0.935	0.892	0.576	0.5558	73500	670000	800000	4.86629	7.5619e-06	0.114214
2	72	6	SPL5	UKVDL206	B5	0.828	0.785			73500	670000	800000	4.86629
2	72	6	SPL5	UKVDL206	C5	0.352	0.309			73500	670000	800000	4.86629
2	72	6	SPL5	UKVDL206	D5	0.363	0.32			73500	670000	800000	4.86629
3	72	9	SPL5	UKVDL206	A5	1.113	1.071	0.925	0.9048	120500	710000	1.7e+06	5.08099	7.50871e-06	0.178076
3	72	9	SPL5	UKVDL206	B5	0.783	0.741			120500	710000	1.7e+06	5.08099
3	72	9	SPL5	UKVDL206	C5	0.784	0.741			120500	710000	1.7e+06	5.08099
3	72	9	SPL5	UKVDL206	D5	1.191	1.148			120500	710000	1.7e+06	5.08099
4	72	3	SPL5	UKVDL206	A5	0.424	0.377	0.359	0.3388	12000	120000		4.07918	2.82333e-05	0.0830559
4	72	3	SPL5	UKVDL206	B5	0.466	0.419			12000	120000		4.07918
4	72	3	SPL5	UKVDL206	C5	0.361	0.314			12000	120000		4.07918
4	72	3	SPL5	UKVDL206	D5	0.371	0.324			12000	120000		4.07918
1	24	1	SPL6	WSU001	A6	0.41	0.365	0.42	0.3998	21000	220000	200000	4.32222	1.90381e-05	0.0924988
1	24	1	SPL6	WSU001	B6	0.528	0.484			21000	220000	200000	4.32222
1	24	1	SPL6	WSU001	C6	0.434	0.389			21000	220000	200000	4.32222
1	24	1	SPL6	WSU001	D6	0.485	0.44			21000	220000	200000	4.32222
2	24	4	SPL6	WSU001	A6	0.322	0.277	0.213	0.1928	56000	420000	700000	4.74819	3.44286e-06	0.040605
2	24	4	SPL6	WSU001	B6	0.305	0.261			56000	420000	700000	4.74819
2	24	4	SPL6	WSU001	C6	0.16	0.116			56000	420000	700000	4.74819
2	24	4	SPL6	WSU001	D6	0.242	0.198			56000	420000	700000	4.74819
3	24	7	SPL6	WSU001	A6	0.224	0.181	0.167	0.1468	10500	110000	100000	4.02119	1.3981e-05	0.0365066
3	24	7	SPL6	WSU001	B6	0.197	0.153			10500	110000	100000	4.02119
3	24	7	SPL6	WSU001	C6	0.236	0.193			10500	110000	100000	4.02119
3	24	7	SPL6	WSU001	D6	0.184	0.14			10500	110000	100000	4.02119
4	24	1	SPL6	WSU001	A6	0.35	0.306	0.356333	0.336133	20000	200000	200000	4.30103	1.68067e-05	0.0781518
4	24	1	SPL6	WSU001	B6	1.878	1.834OMIT			20000	200000	200000	4.30103
4	24	1	SPL6	WSU001	C6	0.419	0.376			20000	200000	200000	4.30103
4	24	1	SPL6	WSU001	D6	0.431	0.387			20000	200000	200000	4.30103
1	48	2	SPL6	WSU001	A6	0.445	0.401	0.642	0.6218	21000	220000	200000	4.32222	2.96095e-05	0.143861
1	48	2	SPL6	WSU001	B6	0.561	0.517			21000	220000	200000	4.32222
1	48	2	SPL6	WSU001	C6	0.891	0.847			21000	220000	200000	4.32222
1	48	2	SPL6	WSU001	D6	0.85	0.805			21000	220000	200000	4.32222
2	48	5	SPL6	WSU001	A6	0.494	0.45	0.482	0.4618	56000	420000	700000	4.74819	8.24643e-06	0.0972582
2	48	5	SPL6	WSU001	B6	0.6	0.556			56000	420000	700000	4.74819
2	48	5	SPL6	WSU001	C6	0.508	0.464			56000	420000	700000	4.74819
2	48	5	SPL6	WSU001	D6	0.503	0.459			56000	420000	700000	4.74819
3	48	8	SPL6	WSU001	A6	0.488	0.444	0.426	0.4058	10500	110000	100000	4.02119	3.86476e-05	0.100915
3	48	8	SPL6	WSU001	B6	0.483	0.439			10500	110000	100000	4.02119
3	48	8	SPL6	WSU001	C6	0.452	0.408			10500	110000	100000	4.02119
3	48	8	SPL6	WSU001	D6	0.456	0.412			10500	110000	100000	4.02119
4	48	2	SPL6	WSU001	A6	0.081	0.035	0.05	0.0298	20000	200000	200000	4.30103	1.49e-06	0.00692857
4	48	2	SPL6	WSU001	B6	0.066	0.02			20000	200000	200000	4.30103
4	48	2	SPL6	WSU001	C6	0.112	0.066			20000	200000	200000	4.30103
4	48	2	SPL6	WSU001	D6	0.124	0.078			20000	200000	200000	4.30103
1	72	3	SPL6	WSU001	A6	0.625	0.582	0.595	0.5748	21000	220000	200000	4.32222	2.73714e-05	0.132987
1	72	3	SPL6	WSU001	B6	0.881	0.838			21000	220000	200000	4.32222
1	72	3	SPL6	WSU001	C6	0.584	0.541			21000	220000	200000	4.32222
1	72	3	SPL6	WSU001	D6	0.461	0.418			21000	220000	200000	4.32222
2	72	6	SPL6	WSU001	A6	0.42	0.377	0.338	0.3178	56000	420000	700000	4.74819	5.675e-06	0.0669308
2	72	6	SPL6	WSU001	B6	0.396	0.353			56000	420000	700000	4.74819
2	72	6	SPL6	WSU001	C6	0.454	0.41			56000	420000	700000	4.74819
2	72	6	SPL6	WSU001	D6	0.254	0.211			56000	420000	700000	4.74819
3	72	9	SPL6	WSU001	A6	0.331	0.289	0.368	0.3478	10500	110000	100000	4.02119	3.31238e-05	0.0864918
3	72	9	SPL6	WSU001	B6	0.411	0.368			10500	110000	100000	4.02119
3	72	9	SPL6	WSU001	C6	0.511	0.468			10500	110000	100000	4.02119
3	72	9	SPL6	WSU001	D6	0.392	0.349			10500	110000	100000	4.02119
4	72	3	SPL6	WSU001	A6	0.378	0.332	0.36	0.3398	20000	200000	200000	4.30103	1.699e-05	0.0790043
4	72	3	SPL6	WSU001	B6	0.404	0.358			20000	200000	200000	4.30103
4	72	3	SPL6	WSU001	C6	0.441	0.394			20000	200000	200000	4.30103
4	72	3	SPL6	WSU001	D6	0.403	0.356			20000	200000	200000	4.30103
1	24	1	SPL7	WSU002	A7	0.391	0.347	0.365	0.3448	3000	30000		3.47712	0.000114933	0.0991625
1	24	1	SPL7	WSU002	B7	0.411	0.366			3000	30000		3.47712
1	24	1	SPL7	WSU002	C7	0.411	0.367			3000	30000		3.47712
1	24	1	SPL7	WSU002	D7	0.426	0.382			3000	30000		3.47712
2	24	4	SPL7	WSU002	A7	0.353	0.309	0.227	0.2068	1000	10000		3	0.0002068	0.0689333
2	24	4	SPL7	WSU002	B7	0.407	0.363			1000	10000		3
2	24	4	SPL7	WSU002	C7	0.121	0.077			1000	10000		3
2	24	4	SPL7	WSU002	D7	0.203	0.159			1000	10000		3
3	24	7	SPL7	WSU002	A7	0.108	0.065	0.062	0.0418	8500	70000	100000	3.92942	4.91765e-06	0.0106377
3	24	7	SPL7	WSU002	B7	0.126	0.083			8500	70000	100000	3.92942
3	24	7	SPL7	WSU002	C7	0.081	0.038			8500	70000	100000	3.92942
3	24	7	SPL7	WSU002	D7	0.328	0.285OMIT			8500	70000	100000	3.92942
4	24	1	SPL7	WSU002	A7	0.332	0.288	0.443	0.4228	2000	20000		3.30103	0.0002114	0.128081
4	24	1	SPL7	WSU002	B7	0.614	0.57			2000	20000		3.30103
4	24	1	SPL7	WSU002	C7	0.555	0.512			2000	20000		3.30103
4	24	1	SPL7	WSU002	D7	0.446	0.402			2000	20000		3.30103
5	24	1	SPL7	WSU002	A1	0.276	0.233	0.229	0.2088	2000	20000		3.30103	0.0001044	0.063253
5	24	1	SPL7	WSU002	B1	0.19	0.146			2000	20000		3.30103
5	24	1	SPL7	WSU002	C1	0.269	0.226			2000	20000		3.30103
5	24	1	SPL7	WSU002	D1	0.356	0.313			2000	20000		3.30103
6	24	1	SPL7	WSU002	A2	0.189	0.145	0.191	0.1708	6000	20000	100000	3.77815	2.84667e-05	0.0452073
6	24	1	SPL7	WSU002	B2	0.209	0.166			6000	20000	100000	3.77815
6	24	1	SPL7	WSU002	C2	0.276	0.233			6000	20000	100000	3.77815
6	24	1	SPL7	WSU002	D2	0.265	0.222			6000	20000	100000	3.77815
1	48	2	SPL7	WSU002	A7	0.509	0.464	0.562	0.5418	3000	30000		3.47712	0.0001806	0.155819
1	48	2	SPL7	WSU002	B7	0.554	0.509			3000	30000		3.47712
1	48	2	SPL7	WSU002	C7	0.823	0.779			3000	30000		3.47712
1	48	2	SPL7	WSU002	D7	0.542	0.497			3000	30000		3.47712
2	48	5	SPL7	WSU002	A7	0.537	0.493	0.371	0.3508	1000	10000		3	0.0003508	0.116933
2	48	5	SPL7	WSU002	B7	0.498	0.453			1000	10000		3
2	48	5	SPL7	WSU002	C7	0.392	0.347			1000	10000		3
2	48	5	SPL7	WSU002	D7	0.236	0.191			1000	10000		3
3	48	8	SPL7	WSU002	A7	0.353	0.309	0.472	0.4518	8500	70000	100000	3.92942	5.31529e-05	0.114979
3	48	8	SPL7	WSU002	B7	0.453	0.409			8500	70000	100000	3.92942
3	48	8	SPL7	WSU002	C7	0.614	0.57			8500	70000	100000	3.92942
3	48	8	SPL7	WSU002	D7	0.644	0.601			8500	70000	100000	3.92942
4	48	2	SPL7	WSU002	A7	0.11	0.064	0.086	0.0658	2000	20000		3.30103	3.29e-05	0.0199332
4	48	2	SPL7	WSU002	B7	0.082	0.036			2000	20000		3.30103
4	48	2	SPL7	WSU002	C7	0.165	0.119			2000	20000		3.30103
4	48	2	SPL7	WSU002	D7	0.172	0.126			2000	20000		3.30103
5	48	2	SPL7	WSU002	A1	0.474	0.428	0.418	0.3978	2000	20000		3.30103	0.0001989	0.120508
5	48	2	SPL7	WSU002	B1	0.446	0.4			2000	20000		3.30103
5	48	2	SPL7	WSU002	C1	0.461	0.416			2000	20000		3.30103
5	48	2	SPL7	WSU002	D1	0.471	0.426			2000	20000		3.30103
6	48	2	SPL7	WSU002	A2	0.436	0.39	0.404	0.3838	6000	20000	100000	3.77815	6.39667e-05	0.101584
6	48	2	SPL7	WSU002	B2	0.485	0.44			6000	20000	100000	3.77815
6	48	2	SPL7	WSU002	C2	0.436	0.391			6000	20000	100000	3.77815
6	48	2	SPL7	WSU002	D2	0.442	0.396			6000	20000	100000	3.77815
1	72	3	SPL7	WSU002	A7	0.749	0.706	0.599	0.5788	3000	30000		3.47712	0.000192933	0.16646
1	72	3	SPL7	WSU002	B7	0.93	0.887			3000	30000		3.47712
1	72	3	SPL7	WSU002	C7	0.557	0.514			3000	30000		3.47712
1	72	3	SPL7	WSU002	D7	0.331	0.288			3000	30000		3.47712
2	72	6	SPL7	WSU002	A7	0.335	0.292	0.254	0.2338	1000	10000		3	0.0002338	0.0779333
2	72	6	SPL7	WSU002	B7	0.352	0.309			1000	10000		3
2	72	6	SPL7	WSU002	C7	0.204	0.161			1000	10000		3
2	72	6	SPL7	WSU002	D7	0.296	0.253			1000	10000		3
3	72	9	SPL7	WSU002	A7	0.335	0.292	0.328	0.3078	8500	70000	100000	3.92942	3.62118e-05	0.0783322
3	72	9	SPL7	WSU002	B7	0.429	0.387			8500	70000	100000	3.92942
3	72	9	SPL7	WSU002	C7	0.396	0.353			8500	70000	100000	3.92942
3	72	9	SPL7	WSU002	D7	0.322	0.279			8500	70000	100000	3.92942
4	72	3	SPL7	WSU002	A7	1.153	1.107OMIT	0.41	0.3898	2000	20000		3.30103	0.0001949	0.118084
4	72	3	SPL7	WSU002	B7	0.443	0.397			2000	20000		3.30103
4	72	3	SPL7	WSU002	C7	0.506	0.459			2000	20000		3.30103
4	72	3	SPL7	WSU002	D7	0.421	0.374			2000	20000		3.30103
5	72	3	SPL7	WSU002	A1	0.493	0.45	0.407	0.3868	2000	20000		3.30103	0.0001934	0.117176
5	72	3	SPL7	WSU002	B1	0.353	0.31			2000	20000		3.30103
5	72	3	SPL7	WSU002	C1	0.509	0.466			2000	20000		3.30103
5	72	3	SPL7	WSU002	D1	0.447	0.404			2000	20000		3.30103
6	72	3	SPL7	WSU002	A2	0.326	0.282	0.35	0.3298	6000	20000	100000	3.77815	5.49667e-05	0.0872914
6	72	3	SPL7	WSU002	B2	0.348	0.305			6000	20000	100000	3.77815
6	72	3	SPL7	WSU002	C2	0.435	0.392			6000	20000	100000	3.77815
6	72	3	SPL7	WSU002	D2	0.464	0.421			6000	20000	100000	3.77815
1	24	1	SPL8	WSU003	A8	0.381	0.336	0.32	0.2998	21000	210000		4.32222	1.42762e-05	0.0693625
1	24	1	SPL8	WSU003	B8	0.401	0.356			21000	210000		4.32222
1	24	1	SPL8	WSU003	C8	0.332	0.288			21000	210000		4.32222
1	24	1	SPL8	WSU003	D8	0.343	0.299			21000	210000		4.32222
2	24	4	SPL8	WSU003	A8	0.48	0.435	0.264	0.2438	21000	320000	100000	4.32222	1.16095e-05	0.0564062
2	24	4	SPL8	WSU003	B8	0.325	0.28			21000	320000	100000	4.32222
2	24	4	SPL8	WSU003	C8	0.211	0.167			21000	320000	100000	4.32222
2	24	4	SPL8	WSU003	D8	0.218	0.173			21000	320000	100000	4.32222
3	24	7	SPL8	WSU003	A8	0.952	0.909OMIT	0.235333	0.215133	41500	330000	500000	4.61805	5.18394e-06	0.0465853
3	24	7	SPL8	WSU003	B8	0.226	0.183			41500	330000	500000	4.61805
3	24	7	SPL8	WSU003	C8	0.176	0.133			41500	330000	500000	4.61805
3	24	7	SPL8	WSU003	D8	0.433	0.39			41500	330000	500000	4.61805
4	24	1	SPL8	WSU003	A8	1.548	1.505	0.771667	0.751467	90500	410000	1400000	4.95665	8.3035e-06	0.151608
4	24	1	SPL8	WSU003	B8	2.282	2.239OMIT			90500	410000	1400000	4.95665
4	24	1	SPL8	WSU003	C8	0.526	0.482			90500	410000	1400000	4.95665
4	24	1	SPL8	WSU003	D8	0.372	0.328			90500	410000	1400000	4.95665
1	48	2	SPL8	WSU003	A8	0.383	0.338	0.422	0.4018	21000	210000		4.32222	1.91333e-05	0.0929615
1	48	2	SPL8	WSU003	B8	0.44	0.396			21000	210000		4.32222
1	48	2	SPL8	WSU003	C8	0.58	0.535			21000	210000		4.32222
1	48	2	SPL8	WSU003	D8	0.463	0.418			21000	210000		4.32222
2	48	5	SPL8	WSU003	A8	0.51	0.466	0.404	0.3838	21000	320000	100000	4.32222	1.82762e-05	0.088797
2	48	5	SPL8	WSU003	B8	0.558	0.513			21000	320000	100000	4.32222
2	48	5	SPL8	WSU003	C8	0.449	0.404			21000	320000	100000	4.32222
2	48	5	SPL8	WSU003	D8	0.279	0.235			21000	320000	100000	4.32222
3	48	8	SPL8	WSU003	A8	0.576	0.532	0.557	0.5368	41500	330000	500000	4.61805	1.29349e-05	0.11624
3	48	8	SPL8	WSU003	B8	0.508	0.464			41500	330000	500000	4.61805
3	48	8	SPL8	WSU003	C8	0.898	0.854			41500	330000	500000	4.61805
3	48	8	SPL8	WSU003	D8	0.421	0.377			41500	330000	500000	4.61805
4	48	2	SPL8	WSU003	A8	0.162	0.116	0.24	0.2198	90500	410000	1400000	4.95665	2.42873e-06	0.0443445
4	48	2	SPL8	WSU003	B8	0.197	0.151			90500	410000	1400000	4.95665
4	48	2	SPL8	WSU003	C8	0.37	0.324			90500	410000	1400000	4.95665
4	48	2	SPL8	WSU003	D8	0.415	0.369			90500	410000	1400000	4.95665
1	72	3	SPL8	WSU003	A8	0.925	0.882	0.629	0.6088	21000	210000		4.32222	2.89905e-05	0.140854
1	72	3	SPL8	WSU003	B8	0.864	0.821			21000	210000		4.32222
1	72	3	SPL8	WSU003	C8	0.395	0.352			21000	210000		4.32222
1	72	3	SPL8	WSU003	D8	0.506	0.463			21000	210000		4.32222
2	72	6	SPL8	WSU003	A8	0.476	0.433	0.295	0.2748	21000	320000	100000	4.32222	1.30857e-05	0.0635784
2	72	6	SPL8	WSU003	B8	0.376	0.333			21000	320000	100000	4.32222
2	72	6	SPL8	WSU003	C8	0.221	0.178			21000	320000	100000	4.32222
2	72	6	SPL8	WSU003	D8	0.281	0.238			21000	320000	100000	4.32222
3	72	9	SPL8	WSU003	A8	0.292	0.249	0.314	0.2938	41500	330000	500000	4.61805	7.07952e-06	0.06362
3	72	9	SPL8	WSU003	B8	0.34	0.297			41500	330000	500000	4.61805
3	72	9	SPL8	WSU003	C8	0.41	0.367			41500	330000	500000	4.61805
3	72	9	SPL8	WSU003	D8	0.387	0.344			41500	330000	500000	4.61805
4	72	3	SPL8	WSU003	A8	0.466	0.42	0.432	0.4118	90500	410000	1400000	4.95665	4.55028e-06	0.0830803
4	72	3	SPL8	WSU003	B8	0.43	0.383			90500	410000	1400000	4.95665
4	72	3	SPL8	WSU003	C8	0.479	0.433			90500	410000	1400000	4.95665
4	72	3	SPL8	WSU003	D8	0.538	0.491			90500	410000	1400000	4.95665
1	24	1	SPL9	WSU004	A9	0.255	0.211	0.34	0.3198	27000	140000	400000	4.43136	1.18444e-05	0.0721674
1	24	1	SPL9	WSU004	B9	0.525	0.481			27000	140000	400000	4.43136
1	24	1	SPL9	WSU004	C9	0.41	0.366			27000	140000	400000	4.43136
1	24	1	SPL9	WSU004	D9	0.349	0.304			27000	140000	400000	4.43136
2	24	4	SPL9	WSU004	A9	0.23	0.186	0.15	0.1298	55000	200000	900000	4.74036	2.36e-06	0.0273819
2	24	4	SPL9	WSU004	B9	0.192	0.148			55000	200000	900000	4.74036
2	24	4	SPL9	WSU004	C9	0.159	0.115			55000	200000	900000	4.74036
2	24	4	SPL9	WSU004	D9	0.197	0.153			55000	200000	900000	4.74036
3	24	7	SPL9	WSU004	A9	0.205	0.162	0.1	0.0798	24000	240000		4.38021	3.325e-06	0.0182183
3	24	7	SPL9	WSU004	B9	0.18	0.137			24000	240000		4.38021
3	24	7	SPL9	WSU004	C9	0.101	0.058			24000	240000		4.38021
3	24	7	SPL9	WSU004	D9	0.088	0.045			24000	240000		4.38021
4	24	1	SPL9	WSU004	A9	0.953	0.909OMIT	0.417667	0.397467	3000	30000		3.47712	0.000132489	0.114309
4	24	1	SPL9	WSU004	B9	0.466	0.423			3000	30000		3.47712
4	24	1	SPL9	WSU004	C9	0.458	0.414			3000	30000		3.47712
4	24	1	SPL9	WSU004	D9	0.46	0.416			3000	30000		3.47712
1	48	2	SPL9	WSU004	A9	0.457	0.413	0.508	0.4878	27000	140000	400000	4.43136	1.80667e-05	0.110079
1	48	2	SPL9	WSU004	B9	0.478	0.433			27000	140000	400000	4.43136
1	48	2	SPL9	WSU004	C9	0.701	0.657			27000	140000	400000	4.43136
1	48	2	SPL9	WSU004	D9	0.575	0.53			27000	140000	400000	4.43136
2	48	5	SPL9	WSU004	A9	0.469	0.425	0.498	0.4778	55000	200000	900000	4.74036	8.68727e-06	0.100794
2	48	5	SPL9	WSU004	B9	0.561	0.517			55000	200000	900000	4.74036
2	48	5	SPL9	WSU004	C9	0.654	0.61			55000	200000	900000	4.74036
2	48	5	SPL9	WSU004	D9	0.486	0.442			55000	200000	900000	4.74036
3	48	8	SPL9	WSU004	A9	0.581	0.537	0.55	0.5298	24000	240000		4.38021	2.2075e-05	0.120953
3	48	8	SPL9	WSU004	B9	0.444	0.401			24000	240000		4.38021
3	48	8	SPL9	WSU004	C9	0.724	0.68			24000	240000		4.38021
3	48	8	SPL9	WSU004	D9	0.626	0.582			24000	240000		4.38021
4	48	2	SPL9	WSU004	A9	0.104	0.058	0.098	0.0778	3000	30000		3.47712	2.59333e-05	0.0223748
4	48	2	SPL9	WSU004	B9	0.094	0.048			3000	30000		3.47712
4	48	2	SPL9	WSU004	C9	0.155	0.109			3000	30000		3.47712
4	48	2	SPL9	WSU004	D9	0.224	0.178			3000	30000		3.47712
1	72	3	SPL9	WSU004	A9	0.8	0.757	0.599	0.5788	27000	140000	400000	4.43136	2.1437e-05	0.130614
1	72	3	SPL9	WSU004	B9	0.903	0.86			27000	140000	400000	4.43136
1	72	3	SPL9	WSU004	C9	0.461	0.418			27000	140000	400000	4.43136
1	72	3	SPL9	WSU004	D9	0.405	0.362			27000	140000	400000	4.43136
2	72	6	SPL9	WSU004	A9	0.337	0.294	0.472	0.4518	55000	200000	900000	4.74036	8.21455e-06	0.0953092
2	72	6	SPL9	WSU004	B9	0.51	0.467			55000	200000	900000	4.74036
2	72	6	SPL9	WSU004	C9	0.791	0.748			55000	200000	900000	4.74036
2	72	6	SPL9	WSU004	D9	0.421	0.378			55000	200000	900000	4.74036
3	72	9	SPL9	WSU004	A9	0.334	0.292	0.32	0.2998	24000	240000		4.38021	1.24917e-05	0.0684442
3	72	9	SPL9	WSU004	B9	0.335	0.292			24000	240000		4.38021
3	72	9	SPL9	WSU004	C9	0.398	0.355			24000	240000		4.38021
3	72	9	SPL9	WSU004	D9	0.385	0.342			24000	240000		4.38021
4	72	3	SPL9	WSU004	A9	0.367	0.32	0.325	0.3048	3000	30000		3.47712	0.0001016	0.0876587
4	72	3	SPL9	WSU004	B9	0.29	0.243			3000	30000		3.47712
4	72	3	SPL9	WSU004	C9	0.464	0.417			3000	30000		3.47712
4	72	3	SPL9	WSU004	D9	0.366	0.32			3000	30000		3.47712
1	24	1	SPL10	WSU005	A10	0.148	0.103	0.158	0.1378	5500	10000	100000	3.74036	2.50545e-05	0.0368413
1	24	1	SPL10	WSU005	B10	0.254	0.209			5500	10000	100000	3.74036
1	24	1	SPL10	WSU005	C10	0.215	0.171			5500	10000	100000	3.74036
1	24	1	SPL10	WSU005	D10	0.194	0.15			5500	10000	100000	3.74036
2	24	4	SPL10	WSU005	A10	0.13	0.086	0.095	0.0748	12500	50000	200000	4.09691	5.984e-06	0.0182577
2	24	4	SPL10	WSU005	B10	0.101	0.057			12500	50000	200000	4.09691
2	24	4	SPL10	WSU005	C10	0.12	0.076			12500	50000	200000	4.09691
2	24	4	SPL10	WSU005	D10	0.206	0.162			12500	50000	200000	4.09691
3	24	7	SPL10	WSU005	A10	0.085	0.042	0.027	0.0068	5000	50000		3.69897	1.36e-06	0.00183835
3	24	7	SPL10	WSU005	B10	0.061	0.018			5000	50000		3.69897
3	24	7	SPL10	WSU005	C10	0.074	0.031			5000	50000		3.69897
3	24	7	SPL10	WSU005	D10	0.062	0.019			5000	50000		3.69897
4	24	1	SPL10	WSU005	A10	0.248	0.204	0.184667	0.164467	10000	100000	100000	4	1.64467e-05	0.0411167
4	24	1	SPL10	WSU005	B10	1.504	1.46OMIT			10000	100000	100000	4
4	24	1	SPL10	WSU005	C10	0.253	0.21			10000	100000	100000	4
4	24	1	SPL10	WSU005	D10	0.184	0.14			10000	100000	100000	4
5	24	1	SPL10	WSU005	A3	0.293	0.25	0.191	0.1708	37000	140000	600000	4.5682	4.61622e-06	0.0373889
5	24	1	SPL10	WSU005	B3	0.163	0.12			37000	140000	600000	4.5682
5	24	1	SPL10	WSU005	C3	0.233	0.189			37000	140000	600000	4.5682
5	24	1	SPL10	WSU005	D3	0.25	0.206			37000	140000	600000	4.5682
1	48	2	SPL10	WSU005	A10	0.178	0.134	0.295	0.2748	5500	10000	100000	3.74036	4.99636e-05	0.0734688
1	48	2	SPL10	WSU005	B10	0.341	0.297			5500	10000	100000	3.74036
1	48	2	SPL10	WSU005	C10	0.503	0.459			5500	10000	100000	3.74036
1	48	2	SPL10	WSU005	D10	0.336	0.291			5500	10000	100000	3.74036
2	48	5	SPL10	WSU005	A10	0.168	0.123	0.177	0.1568	12500	50000	200000	4.09691	1.2544e-05	0.0382727
2	48	5	SPL10	WSU005	B10	0.176	0.132			12500	50000	200000	4.09691
2	48	5	SPL10	WSU005	C10	0.297	0.253			12500	50000	200000	4.09691
2	48	5	SPL10	WSU005	D10	0.246	0.201			12500	50000	200000	4.09691
3	48	8	SPL10	WSU005	A10	0.182	0.138	0.235	0.2148	5000	50000		3.69897	4.296e-05	0.0580702
3	48	8	SPL10	WSU005	B10	0.163	0.119			5000	50000		3.69897
3	48	8	SPL10	WSU005	C10	0.389	0.346			5000	50000		3.69897
3	48	8	SPL10	WSU005	D10	0.382	0.338			5000	50000		3.69897
4	48	2	SPL10	WSU005	A10	0.076	0.03	0.05	0.0298	10000	100000	100000	4	2.98e-06	0.00745
4	48	2	SPL10	WSU005	B10	0.088	0.042			10000	100000	100000	4
4	48	2	SPL10	WSU005	C10	0.107	0.061			10000	100000	100000	4
4	48	2	SPL10	WSU005	D10	0.113	0.067			10000	100000	100000	4
5	48	2	SPL10	WSU005	A3	0.268	0.223	0.268	0.2478	37000	140000	600000	4.5682	6.6973e-06	0.0542445
5	48	2	SPL10	WSU005	B3	0.295	0.25			37000	140000	600000	4.5682
5	48	2	SPL10	WSU005	C3	0.337	0.292			37000	140000	600000	4.5682
5	48	2	SPL10	WSU005	D3	0.354	0.309			37000	140000	600000	4.5682
1	72	3	SPL10	WSU005	A10	0.23	0.188	0.266	0.2458	5500	10000	100000	3.74036	4.46909e-05	0.0657156
1	72	3	SPL10	WSU005	B10	0.194	0.151			5500	10000	100000	3.74036
1	72	3	SPL10	WSU005	C10	0.432	0.39			5500	10000	100000	3.74036
1	72	3	SPL10	WSU005	D10	0.377	0.334			5500	10000	100000	3.74036
2	72	6	SPL10	WSU005	A10	0.175	0.132	0.145	0.1248	12500	50000	200000	4.09691	9.984e-06	0.030462
2	72	6	SPL10	WSU005	B10	0.184	0.141			12500	50000	200000	4.09691
2	72	6	SPL10	WSU005	C10	0.213	0.17			12500	50000	200000	4.09691
2	72	6	SPL10	WSU005	D10	0.179	0.136			12500	50000	200000	4.09691
3	72	9	SPL10	WSU005	A10	0.195	0.152	0.197	0.1768	5000	50000		3.69897	3.536e-05	0.0477971
3	72	9	SPL10	WSU005	B10	0.175	0.132			5000	50000		3.69897
3	72	9	SPL10	WSU005	C10	0.362	0.319			5000	50000		3.69897
3	72	9	SPL10	WSU005	D10	0.227	0.184			5000	50000		3.69897
4	72	3	SPL10	WSU005	A10	0.321	0.274	0.2	0.1798	10000	100000	100000	4	1.798e-05	0.04495
4	72	3	SPL10	WSU005	B10	0.347	0.301			10000	100000	100000	4
4	72	3	SPL10	WSU005	C10	0.154	0.108			10000	100000	100000	4
4	72	3	SPL10	WSU005	D10	0.165	0.119			10000	100000	100000	4
5	72	3	SPL10	WSU005	A3	0.433	0.39	0.322	0.3018	37000	140000	600000	4.5682	8.15676e-06	0.0660654
5	72	3	SPL10	WSU005	B3	0.346	0.303			37000	140000	600000	4.5682
5	72	3	SPL10	WSU005	C3	0.314	0.27			37000	140000	600000	4.5682
5	72	3	SPL10	WSU005	D3	0.367	0.324			37000	140000	600000	4.5682
1	24	1	SPL11	WSU006	A11	0.284	0.24	0.206	0.1858	16500	130000	200000	4.21748	1.12606e-05	0.0440547
1	24	1	SPL11	WSU006	B11	0.283	0.239			16500	130000	200000	4.21748
1	24	1	SPL11	WSU006	C11	0.25	0.205			16500	130000	200000	4.21748
1	24	1	SPL11	WSU006	D11	0.186	0.141			16500	130000	200000	4.21748
2	24	4	SPL11	WSU006	A11	0.114	0.07	0.1	0.0798	16000	120000	200000	4.20412	4.9875e-06	0.0189814
2	24	4	SPL11	WSU006	B11	0.208	0.164			16000	120000	200000	4.20412
2	24	4	SPL11	WSU006	C11	0.157	0.112			16000	120000	200000	4.20412
2	24	4	SPL11	WSU006	D11	0.097	0.052			16000	120000	200000	4.20412
3	24	7	SPL11	WSU006	A11	0.112	0.069	0.044	0.0238	9500	90000	100000	3.97772	2.50526e-06	0.00598332
3	24	7	SPL11	WSU006	B11	0.091	0.048			9500	90000	100000	3.97772
3	24	7	SPL11	WSU006	C11	0.078	0.035			9500	90000	100000	3.97772
3	24	7	SPL11	WSU006	D11	0.066	0.023			9500	90000	100000	3.97772
4	24	1	SPL11	WSU006	A11	0.169	0.125	0.168	0.1478	44500	190000	700000	4.64836	3.32135e-06	0.0317962
4	24	1	SPL11	WSU006	B11	0.23	0.186			44500	190000	700000	4.64836
4	24	1	SPL11	WSU006	C11	0.217	0.173			44500	190000	700000	4.64836
4	24	1	SPL11	WSU006	D11	0.23	0.187			44500	190000	700000	4.64836
1	48	2	SPL11	WSU006	A11	0.256	0.211	0.344	0.3238	16500	130000	200000	4.21748	1.96242e-05	0.0767756
1	48	2	SPL11	WSU006	B11	0.415	0.371			16500	130000	200000	4.21748
1	48	2	SPL11	WSU006	C11	0.543	0.498			16500	130000	200000	4.21748
1	48	2	SPL11	WSU006	D11	0.34	0.296			16500	130000	200000	4.21748
2	48	5	SPL11	WSU006	A11	0.403	0.359	0.303	0.2828	16000	120000	200000	4.20412	1.7675e-05	0.0672673
2	48	5	SPL11	WSU006	B11	0.395	0.351			16000	120000	200000	4.20412
2	48	5	SPL11	WSU006	C11	0.32	0.275			16000	120000	200000	4.20412
2	48	5	SPL11	WSU006	D11	0.272	0.228			16000	120000	200000	4.20412
3	48	8	SPL11	WSU006	A11	0.314	0.27	0.269	0.2488	9500	90000	100000	3.97772	2.61895e-05	0.0625483
3	48	8	SPL11	WSU006	B11	0.277	0.233			9500	90000	100000	3.97772
3	48	8	SPL11	WSU006	C11	0.422	0.379			9500	90000	100000	3.97772
3	48	8	SPL11	WSU006	D11	0.237	0.193			9500	90000	100000	3.97772
4	48	2	SPL11	WSU006	A11	0.11	0.064	0.07	0.0498	44500	190000	700000	4.64836	1.1191e-06	0.0107135
4	48	2	SPL11	WSU006	B11	0.101	0.055			44500	190000	700000	4.64836
4	48	2	SPL11	WSU006	C11	0.124	0.078			44500	190000	700000	4.64836
4	48	2	SPL11	WSU006	D11	0.129	0.083			44500	190000	700000	4.64836
1	72	3	SPL11	WSU006	A11	0.298	0.255	0.299	0.2788	16500	130000	200000	4.21748	1.6897e-05	0.0661058
1	72	3	SPL11	WSU006	B11	0.492	0.45			16500	130000	200000	4.21748
1	72	3	SPL11	WSU006	C11	0.257	0.214			16500	130000	200000	4.21748
1	72	3	SPL11	WSU006	D11	0.321	0.278			16500	130000	200000	4.21748
2	72	6	SPL11	WSU006	A11	0.283	0.24	0.164	0.1438	16000	120000	200000	4.20412	8.9875e-06	0.0342045
2	72	6	SPL11	WSU006	B11	0.211	0.168			16000	120000	200000	4.20412
2	72	6	SPL11	WSU006	C11	0.181	0.138			16000	120000	200000	4.20412
2	72	6	SPL11	WSU006	D11	0.154	0.111			16000	120000	200000	4.20412
3	72	9	SPL11	WSU006	A11	0.238	0.195	0.172	0.1518	9500	90000	100000	3.97772	1.59789e-05	0.0381625
3	72	9	SPL11	WSU006	B11	0.195	0.152			9500	90000	100000	3.97772
3	72	9	SPL11	WSU006	C11	0.205	0.162			9500	90000	100000	3.97772
3	72	9	SPL11	WSU006	D11	0.22	0.177			9500	90000	100000	3.97772
4	72	3	SPL11	WSU006	A11	0.175	0.128	0.204	0.1838	44500	190000	700000	4.64836	4.13034e-06	0.0395408
4	72	3	SPL11	WSU006	B11	0.262	0.215			44500	190000	700000	4.64836
4	72	3	SPL11	WSU006	C11	0.279	0.232			44500	190000	700000	4.64836
4	72	3	SPL11	WSU006	D11	0.286	0.239			44500	190000	700000	4.64836
1	24	1	SPL12	WSU007	A12	0.374	0.329	0.331	0.3108	7000	70000		3.8451	4.44e-05	0.0808302
1	24	1	SPL12	WSU007	B12	0.471	0.427			7000	70000		3.8451
1	24	1	SPL12	WSU007	C12	0.256	0.211			7000	70000		3.8451
1	24	1	SPL12	WSU007	D12	0.402	0.357			7000	70000		3.8451
2	24	4	SPL12	WSU007	A12	0.16	0.115	0.099	0.0788	3000	30000		3.47712	2.62667e-05	0.0226624
2	24	4	SPL12	WSU007	B12	0.153	0.109			3000	30000		3.47712
2	24	4	SPL12	WSU007	C12	0.115	0.071			3000	30000		3.47712
2	24	4	SPL12	WSU007	D12	0.146	0.101			3000	30000		3.47712
3	24	7	SPL12	WSU007	A12	0.114	0.071	0.069	0.0488	6000	20000	100000	3.77815	8.13333e-06	0.0129164
3	24	7	SPL12	WSU007	B12	0.13	0.087			6000	20000	100000	3.77815
3	24	7	SPL12	WSU007	C12	0.081	0.038			6000	20000	100000	3.77815
3	24	7	SPL12	WSU007	D12	0.123	0.08			6000	20000	100000	3.77815
4	24	1	SPL12	WSU007	A12	0.306	0.263	0.307	0.2868	12500	150000	100000	4.09691	2.2944e-05	0.070004
4	24	1	SPL12	WSU007	B12	0.427	0.383			12500	150000	100000	4.09691
4	24	1	SPL12	WSU007	C12	0.351	0.308			12500	150000	100000	4.09691
4	24	1	SPL12	WSU007	D12	0.319	0.275			12500	150000	100000	4.09691
5	24	7	SPL12	WSU007	A4	0.217	0.173	0.186	0.1658	31000	220000	400000	4.49136	5.34839e-06	0.0369153
5	24	7	SPL12	WSU007	B4	0.086	0.043			31000	220000	400000	4.49136
5	24	7	SPL12	WSU007	C4	0.303	0.259			31000	220000	400000	4.49136
5	24	7	SPL12	WSU007	D4	0.311	0.268			31000	220000	400000	4.49136
6	24	1	SPL12	WSU007	A5	0.237	0.194	0.215	0.1948	30000	200000	400000	4.47712	6.49333e-06	0.0435101
6	24	1	SPL12	WSU007	B5	0.098	0.054			30000	200000	400000	4.47712
6	24	1	SPL12	WSU007	C5	0.321	0.277			30000	200000	400000	4.47712
6	24	1	SPL12	WSU007	D5	0.38	0.336			30000	200000	400000	4.47712
1	48	2	SPL12	WSU007	A12	0.348	0.304	0.458	0.4378	7000	70000		3.8451	6.25429e-05	0.113859
1	48	2	SPL12	WSU007	B12	0.638	0.593			7000	70000		3.8451
1	48	2	SPL12	WSU007	C12	0.53	0.486			7000	70000		3.8451
1	48	2	SPL12	WSU007	D12	0.493	0.448			7000	70000		3.8451
2	48	5	SPL12	WSU007	A12	0.67	0.626	0.572	0.5518	3000	30000		3.47712	0.000183933	0.158694
2	48	5	SPL12	WSU007	B12	0.745	0.7			3000	30000		3.47712
2	48	5	SPL12	WSU007	C12	0.626	0.582			3000	30000		3.47712
2	48	5	SPL12	WSU007	D12	0.424	0.38			3000	30000		3.47712
3	48	8	SPL12	WSU007	A12	0.582	0.538	0.721	0.7008	6000	20000	100000	3.77815	0.0001168	0.185488
3	48	8	SPL12	WSU007	B12	0.358	0.314			6000	20000	100000	3.77815
3	48	8	SPL12	WSU007	C12	1.147	1.103			6000	20000	100000	3.77815
3	48	8	SPL12	WSU007	D12	0.975	0.931			6000	20000	100000	3.77815
4	48	2	SPL12	WSU007	A12	0.164	0.118	0.138	0.1178	12500	150000	100000	4.09691	9.424e-06	0.0287534
4	48	2	SPL12	WSU007	B12	0.179	0.133			12500	150000	100000	4.09691
4	48	2	SPL12	WSU007	C12	0.194	0.148			12500	150000	100000	4.09691
4	48	2	SPL12	WSU007	D12	0.198	0.152			12500	150000	100000	4.09691
5	48	8	SPL12	WSU007	A4	0.423	0.378	0.431	0.4108	31000	220000	400000	4.49136	1.32516e-05	0.0914645
5	48	8	SPL12	WSU007	B4	0.553	0.508			31000	220000	400000	4.49136
5	48	8	SPL12	WSU007	C4	0.436	0.391			31000	220000	400000	4.49136
5	48	8	SPL12	WSU007	D4	0.492	0.447			31000	220000	400000	4.49136
6	48	2	SPL12	WSU007	A5	0.372	0.327	0.378	0.3578	30000	200000	400000	4.47712	1.19267e-05	0.0799174
6	48	2	SPL12	WSU007	B5	0.415	0.37			30000	200000	400000	4.47712
6	48	2	SPL12	WSU007	C5	0.474	0.429			30000	200000	400000	4.47712
6	48	2	SPL12	WSU007	D5	0.431	0.386			30000	200000	400000	4.47712
1	72	3	SPL12	WSU007	A12	0.932	0.889	0.58	0.5598	7000	70000		3.8451	7.99714e-05	0.145588
1	72	3	SPL12	WSU007	B12	0.772	0.729			7000	70000		3.8451
1	72	3	SPL12	WSU007	C12	0.384	0.341			7000	70000		3.8451
1	72	3	SPL12	WSU007	D12	0.405	0.362			7000	70000		3.8451
2	72	6	SPL12	WSU007	A12	0.27	0.226	0.245	0.2248	3000	30000		3.47712	7.49333e-05	0.0646512
2	72	6	SPL12	WSU007	B12	0.44	0.397			3000	30000		3.47712
2	72	6	SPL12	WSU007	C12	0.184	0.141			3000	30000		3.47712
2	72	6	SPL12	WSU007	D12	0.258	0.215			3000	30000		3.47712
3	72	9	SPL12	WSU007	A12	0.337	0.294	0.348	0.3278	6000	20000	100000	3.77815	5.46333e-05	0.086762
3	72	9	SPL12	WSU007	B12	0.401	0.359			6000	20000	100000	3.77815
3	72	9	SPL12	WSU007	C12	0.465	0.422			6000	20000	100000	3.77815
3	72	9	SPL12	WSU007	D12	0.359	0.316			6000	20000	100000	3.77815
4	72	3	SPL12	WSU007	A12	0.388	0.342	0.297	0.2768	12500	150000	100000	4.09691	2.2144e-05	0.0675631
4	72	3	SPL12	WSU007	B12	0.322	0.276			12500	150000	100000	4.09691
4	72	3	SPL12	WSU007	C12	0.275	0.229			12500	150000	100000	4.09691
4	72	3	SPL12	WSU007	D12	0.387	0.34			12500	150000	100000	4.09691
5	72	9	SPL12	WSU007	A4	0.288	0.244	0.344	0.3238	31000	220000	400000	4.49136	1.04452e-05	0.0720939
5	72	9	SPL12	WSU007	B4	0.403	0.36			31000	220000	400000	4.49136
5	72	9	SPL12	WSU007	C4	0.372	0.329			31000	220000	400000	4.49136
5	72	9	SPL12	WSU007	D4	0.486	0.443			31000	220000	400000	4.49136
6	72	3	SPL12	WSU007	A5	0.267	0.223	0.315	0.2948	30000	200000	400000	4.47712	9.82667e-06	0.0658459
6	72	3	SPL12	WSU007	B5	0.311	0.268			30000	200000	400000	4.47712
6	72	3	SPL12	WSU007	C5	0.441	0.398			30000	200000	400000	4.47712
6	72	3	SPL12	WSU007	D5	0.415	0.372			30000	200000	400000	4.47712
